# Supplementary material for: Comprehensive Analysis of the Naturally Processed Peptide Repertoire: Differences between HLA-A and B in the Immunopeptidome
Source: PubMed Central journal article supplement (PMC4574158; doi:10.1371/journal.pone.0136417), 2015-09-16

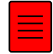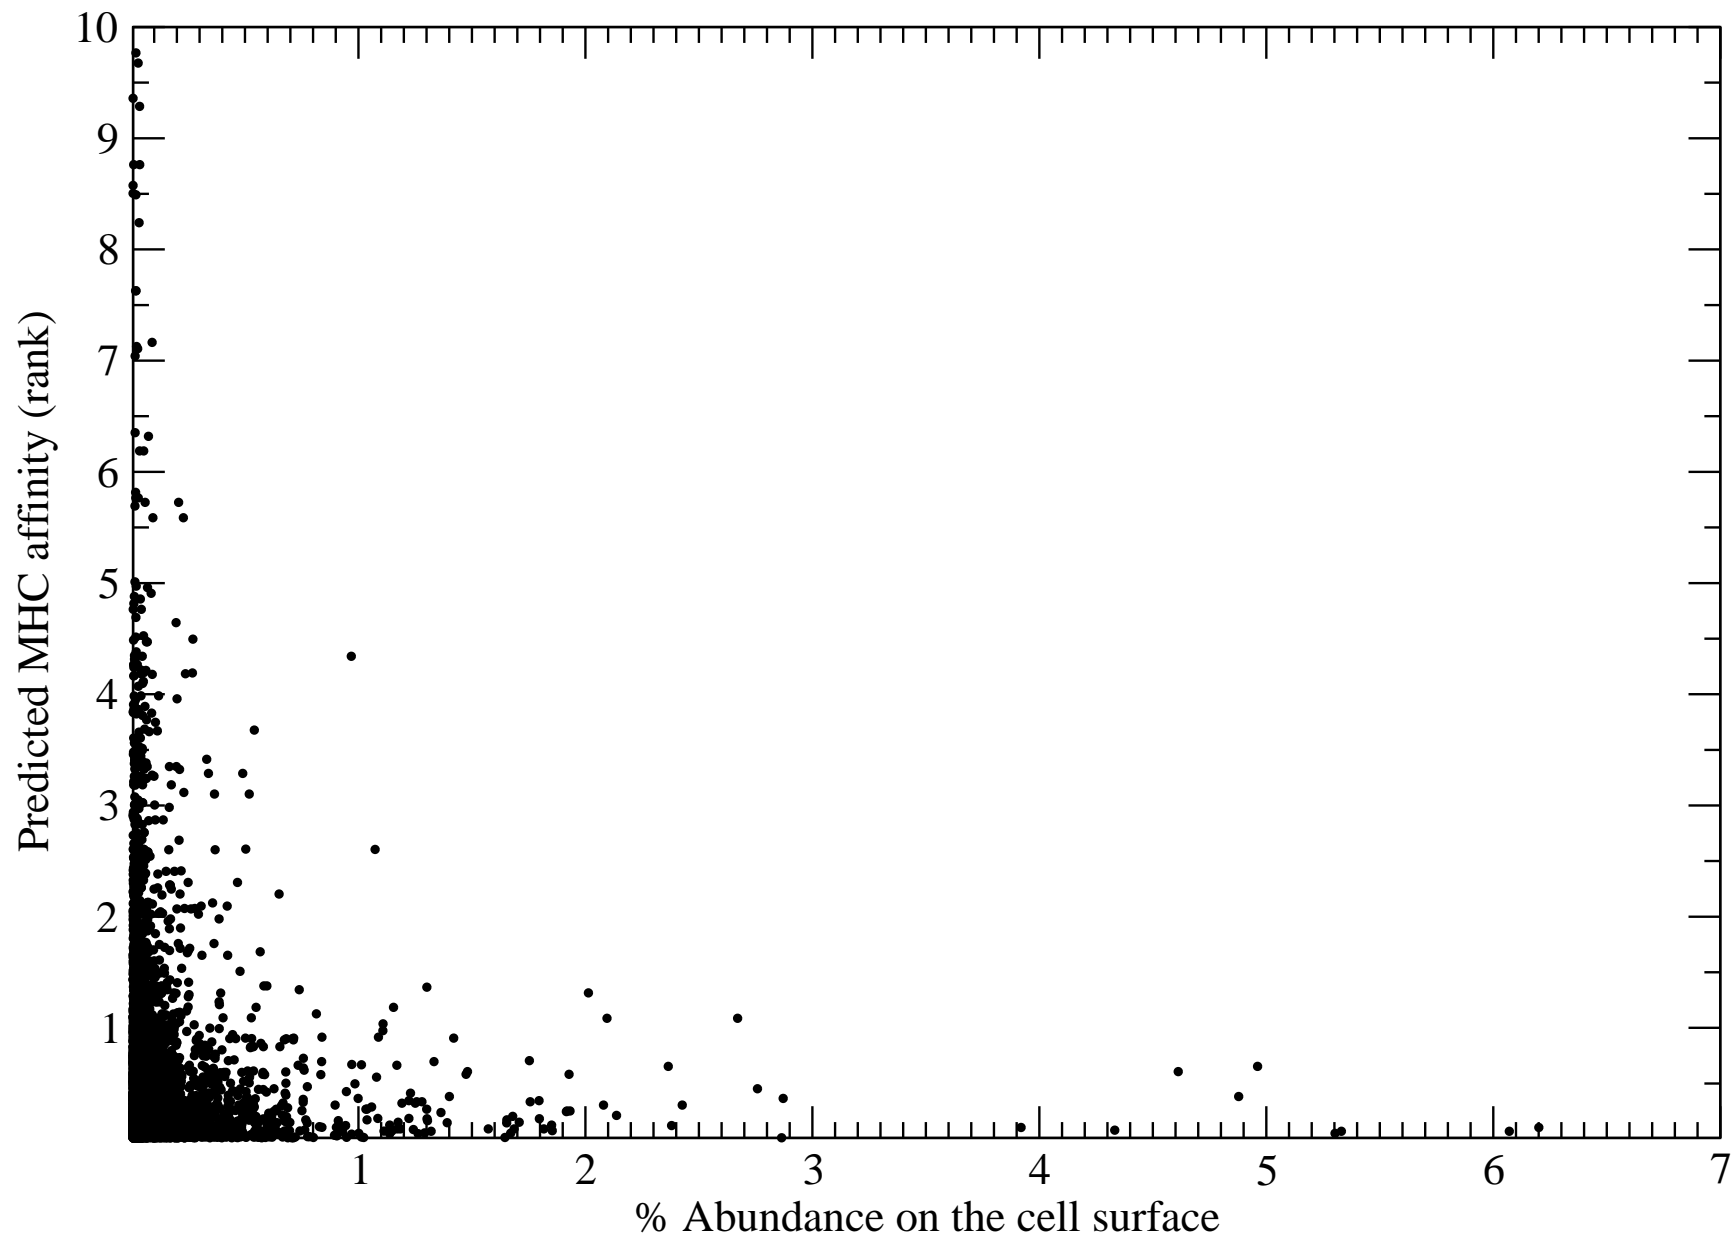

Supplement: pone.0136417.s004.pdf [file pone.0136417.s004.pdf]
