# Supplementary material for: Comprehensive Analysis of the Naturally Processed Peptide Repertoire: Differences between HLA-A and B in the Immunopeptidome
Source: PLoS One. 2015 Sep 16;10(9):e0136417. doi: 10.1371/journal.pone.0136417 (PMC4574158; doi:10.1371/journal.pone.0136417)
Supplement: S2 Table — Peptides derived of 1387 unique human genes were found solely in uninfected cells. For each of the genes, the HGNC Approved name and ID are listed, as well as their chromosomal location (HGNC Database, HUGO Gene Nomenclature Committee (HGNC), EMBL Outstation—Hinxton, European Bioinformatics Institute, Wellcome Trust Genome Campus, Hinxton, Cambridgeshire, CB10 1SD, UK www.genenames.org. Analyzed in June 2013). (XLSX) [file pone.0136417.s006.xlsx]

## Sheet: Blad1
S2 Table. Human genes downregulated during MV infection
Gene	HGNC Approved Name	HGNC ID	Location
AAMP	angio-associated, migratory cell protein	HGNC:18	2q
AASDHPPT	aminoadipate-semialdehyde dehydrogenase-phosphopantetheinyl transferase	HGNC:14235	11q22
ABCA12	ATP-binding cassette, sub-family A (ABC1), member 12	HGNC:14637	2q34
ABCC1	ATP-binding cassette, sub-family C (CFTR/MRP), member 1	HGNC:51	16p13.1
ABHD13	abhydrolase domain containing 13	HGNC:20293	13q33.2
ABHD4	abhydrolase domain containing 4	HGNC:20154	14q11.1
ABR	active BCR-related	HGNC:81	17p13
ACOX1	acyl-CoA oxidase 1, palmitoyl	HGNC:119	17q25.1
ACSL3	acyl-CoA synthetase long-chain family member 3	HGNC:3570	2q34-q35
ACTL8	actin-like 8	HGNC:24018	1p36.2-p35
ACTN2	actinin, alpha 2	HGNC:164	1q42-q43
ACTR5	ARP5 actin-related protein 5 homolog (yeast)	HGNC:14671	20q12
ACY3	aspartoacylase (aminocyclase) 3	HGNC:24104	11q13
ADAM20	ADAM metallopeptidase domain 20	HGNC:199	14q24.2
ADAM23	ADAM metallopeptidase domain 23	HGNC:202	2q33
ADAP1	ArfGAP with dual PH domains 1	HGNC:16486	7p22.3
ADCY6	adenylate cyclase 6	HGNC:237	12q12-q13
ADK	adenosine kinase	HGNC:257	10q22.2
ADRBK1	adrenergic, beta, receptor kinase 1	HGNC:289	11q13
AGAP2	ArfGAP with GTPase domain, ankyrin repeat and PH domain 2	HGNC:16921	12q13.2
AGRN	agrin	HGNC:329	1p36.33
AGTPBP1	ATP/GTP binding protein 1	HGNC:17258	9q21.33
AHCYL1	adenosylhomocysteinase-like 1	HGNC:344	1p13
AHCYL2	adenosylhomocysteinase-like 2	HGNC:22204	7q32.1
AHNAK	AHNAK nucleoprotein	HGNC:347	11q12-q13
AHR	aryl hydrocarbon receptor	HGNC:348	7p15
AHSA1	AHA1, activator of heat shock 90kDa protein ATPase homolog 1 (yeast)	HGNC:1189	14q
AIP	aryl hydrocarbon receptor interacting protein	HGNC:358	11q13.3
AK3	adenylate kinase 3	HGNC:17376	9p24.1
AK8	adenylate kinase 8	HGNC:26526	9q34.13
AKAP1	A kinase (PRKA) anchor protein 1	HGNC:367	17q22
AKR1B15	aldo-keto reductase family 1, member B15	HGNC:37281	7q33
AKTIP	AKT interacting protein	HGNC:16710	16q12.2
ALAS2	aminolevulinate, delta-, synthase 2	HGNC:397	Xp11.21
ALCAM	activated leukocyte cell adhesion molecule	HGNC:400	3q13.1
ALG9	ALG9, alpha-1,2-mannosyltransferase	HGNC:15672	11q23
AMOT	angiomotin	HGNC:17810	Xq23
AMPD3	adenosine monophosphate deaminase 3	HGNC:470	11p15
AMY1A	amylase, alpha 1A (salivary)	HGNC:474	1p21
AMY2B	amylase, alpha 2B (pancreatic)	HGNC:478	1p21
AMZ2	archaelysin family metallopeptidase 2	HGNC:28041	17q24.2
ANAPC10	anaphase promoting complex subunit 10	HGNC:24077	4q31
ANAPC2	anaphase promoting complex subunit 2	HGNC:19989	9q34.3
ANAPC7	anaphase promoting complex subunit 7	HGNC:17380	12q13.12
ANKRA2	ankyrin repeat, family A (RFXANK-like), 2	HGNC:13208	5q12-q13
ANKRD12	ankyrin repeat domain 12	HGNC:29135	18p11.22
ANKRD36	ankyrin repeat domain 36	HGNC:24079	2q11.2
ANKRD55	ankyrin repeat domain 55	HGNC:25681	5q11.2
ANO5	anoctamin 5	HGNC:27337	11p15.1
ANP32B	acidic (leucine-rich) nuclear phosphoprotein 32 family, member B	HGNC:16677	9q22.32
ANXA1	annexin A1	HGNC:533	9q21.13
ANXA8	annexin A8	HGNC:546	10q11.22
AP1G1	adaptor-related protein complex 1, gamma 1 subunit	HGNC:555	16q23
AP1S1	adaptor-related protein complex 1, sigma 1 subunit	HGNC:559	7q22.1
AP1S2	adaptor-related protein complex 1, sigma 2 subunit	HGNC:560	Xp22
AP2B1	adaptor-related protein complex 2, beta 1 subunit	HGNC:563	17q11.2-q12
AP3M1	adaptor-related protein complex 3, mu 1 subunit	HGNC:569	10q22.1-q22.3
AP3M2	adaptor-related protein complex 3, mu 2 subunit	HGNC:570	8p11.2
API5	apoptosis inhibitor 5	HGNC:594	11p12
APOA1	apolipoprotein A-I	HGNC:600	11q23-q24
APOB	apolipoprotein B	HGNC:603	2p24-p23
APOBR	apolipoprotein B receptor	HGNC:24087	16p11.2
APOD	apolipoprotein D	HGNC:612	3q26.2-qter
APOL3	apolipoprotein L, 3	HGNC:14868	22q13.1
APOOL	apolipoprotein O-like	HGNC:24009	Xq21.1
AQP3	aquaporin 3 (Gill blood group)	HGNC:636	9p13
ARAP1	ArfGAP with RhoGAP domain, ankyrin repeat and PH domain 1	HGNC:16925	11q13.3
ARF1	ADP-ribosylation factor 1	HGNC:652	1q42.13
ARF3	ADP-ribosylation factor 3	HGNC:654	12q13.12
ARFGEF2	ADP-ribosylation factor guanine nucleotide-exchange factor 2 (brefeldin A-inhibited)	HGNC:15853	20q13.13
ARFIP2	ADP-ribosylation factor interacting protein 2	HGNC:17160	11p15
ARGLU1	arginine and glutamate rich 1	HGNC:25482	13q33.3
ARHGAP17	Rho GTPase activating protein 17	HGNC:18239	16p12.2-p12.1
ARHGAP35	Rho GTPase activating protein 35	HGNC:4591	19q13.32
ARHGEF1	Rho guanine nucleotide exchange factor (GEF) 1	HGNC:681	19q13.13
ARHGEF9	Cdc42 guanine nucleotide exchange factor (GEF) 9	HGNC:14561	Xq11.1
ARID2	AT rich interactive domain 2 (ARID, RFX-like)	HGNC:18037	12q13.11
ARID5A	AT rich interactive domain 5A (MRF1-like)	HGNC:17361	2p11.1
ARL1	ADP-ribosylation factor-like 1	HGNC:692	12q23.3
ARL17A	ADP-ribosylation factor-like 17A	HGNC:24096	17q21.31
ARL5A	ADP-ribosylation factor-like 5A	HGNC:696	2q23.3
ARL6IP5	ADP-ribosylation-like factor 6 interacting protein 5	HGNC:16937	3p14
ARMC9	armadillo repeat containing 9	HGNC:20730	2q37.1
ARPC5	actin related protein 2/3 complex, subunit 5, 16kDa	HGNC:708	1q
ARRDC1	arrestin domain containing 1	HGNC:28633	9q34.3
ASB1	ankyrin repeat and SOCS box containing 1	HGNC:16011	2q37
ASCC2	activating signal cointegrator 1 complex subunit 2	HGNC:24103	22q12.1
ASH1L	ash1 (absent, small, or homeotic)-like (Drosophila)	HGNC:19088	1q22
ASNA1	arsA arsenite transporter, ATP-binding, homolog 1 (bacterial)	HGNC:752	19p13.13
ASPM	asp (abnormal spindle) homolog, microcephaly associated (Drosophila)	HGNC:19048	1q31
ASPSCR1	alveolar soft part sarcoma chromosome region, candidate 1	HGNC:13825	17q25
ASTN2	astrotactin 2	HGNC:17021	9q33
ATG4C	autophagy related 4C, cysteine peptidase	HGNC:16040	1p31.3
ATG9A	autophagy related 9A	HGNC:22408	2q35
ATP11C	ATPase, class VI, type 11C	HGNC:13554	Xq27.1
ATP1A1	ATPase, Na+/K+ transporting, alpha 1 polypeptide	HGNC:799	1p13
ATP1A2	ATPase, Na+/K+ transporting, alpha 2 polypeptide	HGNC:800	1q23.2
ATP2C1	ATPase, Ca++ transporting, type 2C, member 1	HGNC:13211	3q21.3
ATP5C1	ATP synthase, H+ transporting, mitochondrial F1 complex, gamma polypeptide 1	HGNC:833	10p14
ATP5D	ATP synthase, H+ transporting, mitochondrial F1 complex, delta subunit	HGNC:837	19p13.3
ATP5F1	ATP synthase, H+ transporting, mitochondrial Fo complex, subunit B1	HGNC:840	1p13.2
ATP5O	ATP synthase, H+ transporting, mitochondrial F1 complex, O subunit	HGNC:850	21q22
ATP6AP1	ATPase, H+ transporting, lysosomal accessory protein 1	HGNC:868	Xq28
ATP6V1A	ATPase, H+ transporting, lysosomal 70kDa, V1 subunit A	HGNC:851	3q13.31
ATP6V1C1	ATPase, H+ transporting, lysosomal 42kDa, V1 subunit C1	HGNC:856	8p22.3
ATPAF1	ATP synthase mitochondrial F1 complex assembly factor 1	HGNC:18803	1p33-p32.3
ATRIP	ATR interacting protein	HGNC:33499	3p24.3-p22.1
ATRN	attractin	HGNC:885	20p13
ATXN10	ataxin 10	HGNC:10549	22q13
AURKAIP1	aurora kinase A interacting protein 1	HGNC:24114	1p36.33
BAG5	BCL2-associated athanogene 5	HGNC:941	14q32
BAT5	abhydrolase domain containing 16A	HGNC:13921	6p21.3
BBS5	Bardet-Biedl syndrome 5	HGNC:970	2q31
BCAR3	breast cancer anti-estrogen resistance 3	HGNC:973	1p22.1
BCAS4	breast carcinoma amplified sequence 4	HGNC:14367	20q13
BCKDHB	branched chain keto acid dehydrogenase E1, beta polypeptide	HGNC:987	6q14.1
BCL2A1	BCL2-related protein A1	HGNC:991	15q24.3
BCS1L	BC1 (ubiquinol-cytochrome c reductase) synthesis-like	HGNC:1020	2q35
BET1	Bet1 golgi vesicular membrane trafficking protein	HGNC:14562	7q21.1-q22
BLVRA	biliverdin reductase A	HGNC:1062	7p13
BMS1	BMS1 ribosome biogenesis factor	HGNC:23505	10q11.21
BNIP2	BCL2/adenovirus E1B 19kDa interacting protein 2	HGNC:1083	15q21.3
BOD1L1	biorientation of chromosomes in cell division 1-like 1	HGNC:31792	4p16.1
BOP1	block of proliferation 1	HGNC:15519	8q24.3
BPIFB1	BPI fold containing family B, member 1	HGNC:16108	20q11.21
BPNT1	3'(2'), 5'-bisphosphate nucleotidase 1	HGNC:1096	1q42
BRAT1	BRCA1-associated ATM activator 1	HGNC:21701	7p22.3
BRCA2	breast cancer 2, early onset	HGNC:1101	13q12-q13
BRD7	bromodomain containing 7	HGNC:14310	16q12.1
BRD8	bromodomain containing 8	HGNC:19874	5q31
BRWD1	bromodomain and WD repeat domain containing 1	HGNC:12760	21q22.2
BTBD1	BTB (POZ) domain containing 1	HGNC:1120	15q24
BTLA	B and T lymphocyte associated	HGNC:21087	3q13.2
BTN1A1	butyrophilin, subfamily 1, member A1	HGNC:1135	6p22.1
BUB1B	BUB1 mitotic checkpoint serine/threonine kinase B	HGNC:1149	15q15
BUD13	BUD13 homolog (S. cerevisiae)	HGNC:28199	11q23.3
C10orf104	anaphase promoting complex subunit 16	HGNC:26976	10q22.2
C10orf76	chromosome 10 open reading frame 76	HGNC:25788	10q24.32
C11orf82	chromosome 11 open reading frame 82	HGNC:26351	11q14.1
C12orf23	chromosome 12 open reading frame 23	HGNC:28281	12q23.3
C12orf57	chromosome 12 open reading frame 57	HGNC:29521	12p13.31
C13orf23	proline and serine rich 1	HGNC:20291	13q13.2
C14orf133	VPS33B interacting protein, apical-basolateral polarity regulator, spe-39 homolog	HGNC:20347	14q24.3-q31
C15orf39	chromosome 15 open reading frame 39	HGNC:24497	15q23
C16orf5	cell death-inducing p53 target 1	HGNC:13234	16p13.3
C16orf59	chromosome 16 open reading frame 59	HGNC:25849	16p13.3
C16orf72	chromosome 16 open reading frame 72	HGNC:30103	16p13.2
C17orf49	chromosome 17 open reading frame 49	HGNC:28737	17p13.1
C17orf53	chromosome 17 open reading frame 53	HGNC:28460	17q21.31
C17orf85	chromosome 17 open reading frame 85	HGNC:24612	17p13.2
C18orf25	chromosome 18 open reading frame 25	HGNC:28172	18q21.1
C19orf25	chromosome 19 open reading frame 25	HGNC:26711	19p13.3
C1QBP	complement component 1, q subcomponent binding protein	HGNC:1243	17p13.3
C1orf112	chromosome 1 open reading frame 112	HGNC:25565	1q24.2
C1orf2	family with sequence similarity 189, member B	HGNC:1233	1q21
C1orf94	chromosome 1 open reading frame 94	HGNC:28250	1p34.3
C20orf72	mitochondrial genome maintenance exonuclease 1	HGNC:16205	20p11.23
C21orf33	chromosome 21 open reading frame 33	HGNC:1273	21q22.3
C22orf28	RNA 2',3'-cyclic phosphate and 5'-OH ligase	HGNC:26935	22q12.3
C3	complement component 3	HGNC:1318	19p13.3-p13.2
C3orf38	chromosome 3 open reading frame 38	HGNC:28384	3p11.1
C4orf29	chromosome 4 open reading frame 29	HGNC:26111	4q28.2
C5orf43	small integral membrane protein 15	HGNC:33861	5q12
C6orf89	chromosome 6 open reading frame 89	HGNC:21114	6p21.31
C9orf126	suppressor of cancer cell invasion	HGNC:26709	9q34.11
C9orf41	chromosome 9 open reading frame 41	HGNC:23435	9q21.31
CA2	carbonic anhydrase II	HGNC:1373	8q21.2
CAB39	calcium binding protein 39	HGNC:20292	2q37.1
CACNB4	calcium channel, voltage-dependent, beta 4 subunit	HGNC:1404	2q22-q23
CADPS2	Ca++-dependent secretion activator 2	HGNC:16018	7q31.32
CAMK4	calcium/calmodulin-dependent protein kinase IV	HGNC:1464	5q22.1
CAMLG	calcium modulating ligand	HGNC:1471	5q23
CAMTA2	calmodulin binding transcription activator 2	HGNC:18807	17p13.3
CAND2	cullin-associated and neddylation-dissociated 2 (putative)	HGNC:30689	3p25.2
CAPG	capping protein (actin filament), gelsolin-like	HGNC:1474	2p11.2
CAPZA2	capping protein (actin filament) muscle Z-line, alpha 2	HGNC:1490	7q31.2-q31.3
CASP3	caspase 3, apoptosis-related cysteine peptidase	HGNC:1504	4q34
CASP8	caspase 8, apoptosis-related cysteine peptidase	HGNC:1509	2q33-q34
CBX6	chromobox homolog 6	HGNC:1556	22q13.1
CC2D2A	coiled-coil and C2 domain containing 2A	HGNC:29253	4p15.33
CCDC101	coiled-coil domain containing 101	HGNC:25156	16p11.2
CCDC107	coiled-coil domain containing 107	HGNC:28465	9q13.3
CCDC127	coiled-coil domain containing 127	HGNC:30520	5p15.33
CCDC141	coiled-coil domain containing 141	HGNC:26821	2q31.2
CCDC144A	coiled-coil domain containing 144A	HGNC:29072	17p11.2
CCDC22	coiled-coil domain containing 22	HGNC:28909	Xp11.23
CCDC25	coiled-coil domain containing 25	HGNC:25591	8p21.1
CCDC41	coiled-coil domain containing 41	HGNC:17966	12q22
CCDC47	coiled-coil domain containing 47	HGNC:24856	17q23.3
CCDC58	coiled-coil domain containing 58	HGNC:31136	3q21.1
CCDC59	coiled-coil domain containing 59	HGNC:25005	12q21.31
CCDC63	coiled-coil domain containing 63	HGNC:26669	12q24.11
CCDC66	coiled-coil domain containing 66	HGNC:27709	3p14.3
CCDC69	coiled-coil domain containing 69	HGNC:24487	5q33.1
CCDC85B	coiled-coil domain containing 85B	HGNC:24926	11q13.1
CCDC88A	coiled-coil domain containing 88A	HGNC:25523	2p16.3
CCDC88C	coiled-coil domain containing 88C	HGNC:19967	14q32.12
CCNA2	cyclin A2	HGNC:1578	4q27
CCNC	cyclin C	HGNC:1581	6q21
CCNDBP1	cyclin D-type binding-protein 1	HGNC:1587	15q14-q15
CCNI	cyclin I	HGNC:1595	4q21.1
CCNT2	cyclin T2	HGNC:1600	2q21.3
CCR8	chemokine (C-C motif) receptor 8	HGNC:1609	3p22
CCRN4L	CCR4 carbon catabolite repression 4-like (S. cerevisiae)	HGNC:14254	4q31.1
CCT4	chaperonin containing TCP1, subunit 4 (delta)	HGNC:1617	2p15
CD109	CD109 molecule	HGNC:21685	6q14.1
CD2AP	CD2-associated protein	HGNC:14258	6p12
CD48	CD48 molecule	HGNC:1683	1q21.3-q22
CD58	CD58 molecule	HGNC:1688	1p13
CD72	CD72 molecule	HGNC:1696	9p
CDC14A	cell division cycle 14A	HGNC:1718	1p21
CDC40	cell division cycle 40	HGNC:17350	6q22.1
CDC42EP4	CDC42 effector protein (Rho GTPase binding) 4	HGNC:17147	17q24-q25
CDC45	cell division cycle 45	HGNC:1739	22q11.21
CDC6	cell division cycle 6	HGNC:1744	17q21.3
CDC7	cell division cycle 7	HGNC:1745	1p22
CDC73	cell division cycle 73	HGNC:16783	1q25
CDCA2	cell division cycle associated 2	HGNC:14623	8p21.2
CDCA4	cell division cycle associated 4	HGNC:14625	14q32.33
CDCA7	cell division cycle associated 7	HGNC:14628	2q31.1
CDK1	cyclin-dependent kinase 1	HGNC:1722	10q21.2
CDK11A	cyclin-dependent kinase 11A	HGNC:1730	1p36.33
CDK2	cyclin-dependent kinase 2	HGNC:1771	12q13
CDK4	cyclin-dependent kinase 4	HGNC:1773	12q13
CDK5RAP1	CDK5 regulatory subunit associated protein 1	HGNC:15880	20q11.21
CDK7	cyclin-dependent kinase 7	HGNC:1778	5q12.1
CDK9	cyclin-dependent kinase 9	HGNC:1780	9q34.1
CDKN1C	cyclin-dependent kinase inhibitor 1C (p57, Kip2)	HGNC:1786	11p15.5
CDR2	cerebellar degeneration-related protein 2, 62kDa	HGNC:1799	16p13.1-p12
CDV3	CDV3 homolog (mouse)	HGNC:26928	3q22.1
CDYL	chromodomain protein, Y-like	HGNC:1811	6p25.1
CEP104	centrosomal protein 104kDa	HGNC:24866	1p36.32
CEP76	centrosomal protein 76kDa	HGNC:25727	18p11.21
CFB	complement factor B	HGNC:1037	6p21.3
CHAMP1	chromosome alignment maintaining phosphoprotein 1	HGNC:20311	13q34
CHCHD3	coiled-coil-helix-coiled-coil-helix domain containing 3	HGNC:21906	7q33
CHERP	calcium homeostasis endoplasmic reticulum protein	HGNC:16930	19p13.1
CHFR	checkpoint with forkhead and ring finger domains, E3 ubiquitin protein ligase	HGNC:20455	12q24.33
CHMP7	charged multivesicular body protein 7	HGNC:28439	8p21.2
CIITA	class II, major histocompatibility complex, transactivator	HGNC:7067	16p13
CKAP4	cytoskeleton-associated protein 4	HGNC:16991	12q23.3
CKAP5	cytoskeleton associated protein 5	HGNC:28959	11p11.2
CKS1B	CDC28 protein kinase regulatory subunit 1B	HGNC:19083	1q21.2
CKS2	CDC28 protein kinase regulatory subunit 2	HGNC:2000	9q22
CLASP2	cytoplasmic linker associated protein 2	HGNC:17078	3p24.3
CLIC3	chloride intracellular channel 3	HGNC:2064	9q34.3
CLIP4	CAP-GLY domain containing linker protein family, member 4	HGNC:26108	2p23
CLK4	CDC-like kinase 4	HGNC:13659	5q35
CLPP	ClpP caseinolytic peptidase, ATP-dependent, proteolytic subunit homolog (E. coli)	HGNC:2084	19
CLPTM1L	CLPTM1-like	HGNC:24308	5p15.33
CMC1	COX assembly mitochondrial protein 1 homolog (S. cerevisiae)	HGNC:28783	3p24.1
CMC2	COX assembly mitochondrial protein 2 homolog (S. cerevisiae)	HGNC:24447	16q23.2
CMPK	cytidine monophosphate (UMP-CMP) kinase 1, cytosolic	HGNC:18170	1p34.1-p33
CNOT8	CCR4-NOT transcription complex, subunit 8	HGNC:9207	5q31-q33
CNPPD1	cyclin Pas1/PHO80 domain containing 1	HGNC:25220	2q36
CNTROB	centrobin, centrosomal BRCA2 interacting protein	HGNC:29616	17p13.1
COG4	component of oligomeric golgi complex 4	HGNC:18620	16
COG8	component of oligomeric golgi complex 8	HGNC:18623	16q22.1
COL4A3BP	collagen, type IV, alpha 3 (Goodpasture antigen) binding protein	HGNC:2205	5q13.3
COMMD3	COMM domain containing 3	HGNC:23332	10p12.2
COMMD8	COMM domain containing 8	HGNC:26036	4p12
COMT	catechol-O-methyltransferase	HGNC:2228	22q11.21
COPB1	coatomer protein complex, subunit beta 1	HGNC:2231	11p15.2
COPE	coatomer protein complex, subunit epsilon	HGNC:2234	19p13.11
COPS2	COP9 signalosome subunit 2	HGNC:30747	15q21.2
COPS3	COP9 signalosome subunit 3	HGNC:2239	17p11.2
COQ10B	coenzyme Q10 homolog B (S. cerevisiae)	HGNC:25819	2q33.1
COQ6	coenzyme Q6 monooxygenase	HGNC:20233	14q24.1
CORO1C	coronin, actin binding protein, 1C	HGNC:2254	12q24.1
COX14	cytochrome c oxidase assembly homolog 14 (S. cerevisiae)	HGNC:28216	12q13.12
COX4I1	cytochrome c oxidase subunit IV isoform 1	HGNC:2265	16q24.1
COX6A1	cytochrome c oxidase subunit VIa polypeptide 1	HGNC:2277	12q24
COX6C	cytochrome c oxidase subunit VIc	HGNC:2285	8q22.2
CPA5	carboxypeptidase A5	HGNC:15722	7q32
CPEB4	cytoplasmic polyadenylation element binding protein 4	HGNC:21747	5q21
CPSF1	cleavage and polyadenylation specific factor 1, 160kDa	HGNC:2324	8q24
CPSF2	cleavage and polyadenylation specific factor 2, 100kDa	HGNC:2325	14q31.1
CPSF7	cleavage and polyadenylation specific factor 7, 59kDa	HGNC:30098	11q12.2
CPT2	carnitine palmitoyltransferase 2	HGNC:2330	1p32
CROT	carnitine O-octanoyltransferase	HGNC:2366	7q21.1
CRYZ	crystallin, zeta (quinone reductase)	HGNC:2419	1p31.1
CSDE1	cold shock domain containing E1, RNA-binding	HGNC:29905	1p13.2
CSK	c-src tyrosine kinase	HGNC:2444	15q24.1
CSNK2A1	casein kinase 2, alpha 1 polypeptide	HGNC:2457	20p13
CTAGE5	CTAGE family, member 5	HGNC:7057	14q21.1
CTBP2	C-terminal binding protein 2	HGNC:2495	10q26.13
CTC1	CTS telomere maintenance complex component 1	HGNC:26169	17p13.1
CTNNBL1	catenin, beta like 1	HGNC:15879	20q11.23-q12
CTSG	cathepsin G	HGNC:2532	14q12
CTSS	cathepsin S	HGNC:2545	1q21
CTTNBP2NL	CTTNBP2 N-terminal like	HGNC:25330	1p13.2
CUL4B	cullin 4B	HGNC:2555	Xq23
CXorf26	polysaccharide biosynthesis domain containing 1	HGNC:28790	Xq13.2
CXorf38	chromosome X open reading frame 38	HGNC:28589	Xp11
CYP1B1	cytochrome P450, family 1, subfamily B, polypeptide 1	HGNC:2597	2p22.2
CYP4X1	cytochrome P450, family 4, subfamily X, polypeptide 1	HGNC:20244	1p33
CYTH1	cytohesin 1	HGNC:9501	17q25
DAPK1	death-associated protein kinase 1	HGNC:2674	9q34.1
DBNL	drebrin-like	HGNC:2696	7p13
DCAF12	DDB1 and CUL4 associated factor 12	HGNC:19911	9p11.2
DCAF15	DDB1 and CUL4 associated factor 15	HGNC:25095	19p13.12
DCBLD2	discoidin, CUB and LCCL domain containing 2	HGNC:24627	3q12.2
DCK	deoxycytidine kinase	HGNC:2704	4q13.3-q21.1
DCLK2	doublecortin-like kinase 2	HGNC:19002	4q31.3
DCLRE1C	DNA cross-link repair 1C	HGNC:17642	10p13
DDHD2	DDHD domain containing 2	HGNC:29106	8p11.23
DDI2	DNA-damage inducible 1 homolog 2 (S. cerevisiae)	HGNC:24578	1p36.13
DDIT4	DNA-damage-inducible transcript 4	HGNC:24944	10q22.1
DDR1	discoidin domain receptor tyrosine kinase 1	HGNC:2730	6p21.33
DDX10	DEAD (Asp-Glu-Ala-Asp) box polypeptide 10	HGNC:2735	11q22-q23
DDX11L8	DEAD/H (Asp-Glu-Ala-Asp/His) box helicase 11 like 8	HGNC:37101	12p13.33
DDX17	DEAD (Asp-Glu-Ala-Asp) box helicase 17	HGNC:2740	22q13.1
DDX19A	DEAD (Asp-Glu-Ala-Asp) box polypeptide 19A	HGNC:25628	16q22.1
DDX39A	DEAD (Asp-Glu-Ala-Asp) box polypeptide 39A	HGNC:17821	19p13.12
DDX39B	DEAD (Asp-Glu-Ala-Asp) box polypeptide 39B	HGNC:13917	6p21.33
DDX47	DEAD (Asp-Glu-Ala-Asp) box polypeptide 47	HGNC:18682	12p13.2
DDX54	DEAD (Asp-Glu-Ala-Asp) box polypeptide 54	HGNC:20084	12q24.11
DDX56	DEAD (Asp-Glu-Ala-Asp) box helicase 56	HGNC:18193	7p13
DDX60L	DEAD (Asp-Glu-Ala-Asp) box polypeptide 60-like	HGNC:26429	4q32.3
DENND4C	DENN/MADD domain containing 4C	HGNC:26079	9p22.1
DERL1	derlin 1	HGNC:28454	8q24.13
DGKA	diacylglycerol kinase, alpha 80kDa	HGNC:2849	12q13.3
DHFRL1	dihydrofolate reductase-like 1	HGNC:27309	3q11.2
DHODH	dihydroorotate dehydrogenase (quinone)	HGNC:2867	16q22.2
DHRS4L2	dehydrogenase/reductase (SDR family) member 4 like 2	HGNC:19731	14q11.2
DHX15	DEAH (Asp-Glu-Ala-His) box helicase 15	HGNC:2738	4p15.3
DHX16	DEAH (Asp-Glu-Ala-His) box polypeptide 16	HGNC:2739	6p21.3
DHX29	DEAH (Asp-Glu-Ala-His) box polypeptide 29	HGNC:15815	5q11.2
DIAPH1	diaphanous-related formin 1	HGNC:2876	5q31
DIAPH3	diaphanous-related formin 3	HGNC:15480	13q21.2
DICER1	dicer 1, ribonuclease type III	HGNC:17098	14q32.13
DIS3	DIS3 mitotic control homolog (S. cerevisiae)	HGNC:20604	13q21.32
DKFZp564C0482	-	-	-
DKFZp779C2259	-	-	-
DLG5	discs, large homolog 5 (Drosophila)	HGNC:2904	10q23
DLGAP1	discs, large (Drosophila) homolog-associated protein 1	HGNC:2905	18p11.3
DLGAP4	discs, large (Drosophila) homolog-associated protein 4	HGNC:24476	20q11.23
DMXL2	Dmx-like 2	HGNC:2938	15q21.2
DNAJB1	DnaJ (Hsp40) homolog, subfamily B, member 1	HGNC:5270	19p13.2
DNAJB12	DnaJ (Hsp40) homolog, subfamily B, member 12	HGNC:14891	10q22
DNAJB2	DnaJ (Hsp40) homolog, subfamily B, member 2	HGNC:5228	2q32-q34
DNAJC16	DnaJ (Hsp40) homolog, subfamily C, member 16	HGNC:29157	1p36.1
DNAJC18	DnaJ (Hsp40) homolog, subfamily C, member 18	HGNC:28429	5q31.2
DNAJC30	DnaJ (Hsp40) homolog, subfamily C, member 30	HGNC:16410	7q11.23
DNCI1	dynein, cytoplasmic 1, intermediate chain 1	HGNC:2963	7q21.3-q22.1
DOK1	docking protein 1, 62kDa (downstream of tyrosine kinase 1)	HGNC:2990	2p13
DONSON	downstream neighbor of SON	HGNC:2993	21q22.1
DPY19L4	dpy-19-like 4 (C. elegans)	HGNC:27829	8q22.1
DPYD	dihydropyrimidine dehydrogenase	HGNC:3012	1p22
DPYSL2	dihydropyrimidinase-like 2	HGNC:3014	8p22-p21
DRG1	developmentally regulated GTP binding protein 1	HGNC:3029	22q12.2
DSEL	dermatan sulfate epimerase-like	HGNC:18144	18q22.1
DSG3	desmoglein 3	HGNC:3050	18q12.1
DSN1	DSN1, MIND kinetochore complex component, homolog (S. cerevisiae)	HGNC:16165	20q11.23
DTL	denticleless E3 ubiquitin protein ligase homolog (Drosophila)	HGNC:30288	1q32
DUSP2	dual specificity phosphatase 2	HGNC:3068	2q11
DUSP7	dual specificity phosphatase 7	HGNC:3073	3p21
DYNLL1	dynein, light chain, LC8-type 1	HGNC:15476	12q24.23
DYR	-	-	-
EBF1	early B-cell factor 1	HGNC:3126	5q34
ECHS1	enoyl CoA hydratase, short chain, 1, mitochondrial	HGNC:3151	10q26.2-q26.3
ECT2	epithelial cell transforming sequence 2 oncogene	HGNC:3155	3q26.1-q26.2
EEA1	early endosome antigen 1	HGNC:3185	12q22
EFHA1	mitochondrial calcium uptake 2	HGNC:31830	13q12.11
EHMT1	euchromatic histone-lysine N-methyltransferase 1	HGNC:24650	9
EIF1B	eukaryotic translation initiation factor 1B	HGNC:30792	3p22.1
EIF2AK1	eukaryotic translation initiation factor 2-alpha kinase 1	HGNC:24921	7p22
EIF2B2	eukaryotic translation initiation factor 2B, subunit 2 beta, 39kDa	HGNC:3258	14q24.3
EIF3G	eukaryotic translation initiation factor 3, subunit G	HGNC:3274	19p13.2
EIF3I	eukaryotic translation initiation factor 3, subunit I	HGNC:3272	1p34.1
EIF4A2	eukaryotic translation initiation factor 4A2	HGNC:3284	3q28
EIF4A3	eukaryotic translation initiation factor 4A3	HGNC:18683	17q25.3
EIF4E	eukaryotic translation initiation factor 4E	HGNC:3287	4q21-q25
EIF4E1B	eukaryotic translation initiation factor 4E family member 1B	HGNC:33179	5q35.2
EIF4G3	eukaryotic translation initiation factor 4 gamma, 3	HGNC:3298	1p36.12
EIF4H	eukaryotic translation initiation factor 4H	HGNC:12741	7q11.23
EIF5A2	eukaryotic translation initiation factor 5A2	HGNC:3301	3q26.2
ELF1	E74-like factor 1 (ets domain transcription factor)	HGNC:3316	13q13
ELP2	elongator acetyltransferase complex subunit 2	HGNC:18248	18q12.1
ELP4	elongator acetyltransferase complex subunit 4	HGNC:1171	11p13
EMC8	ER membrane protein complex subunit 8	HGNC:7864	16q24
EME1	essential meiotic endonuclease 1 homolog 1 (S. pombe)	HGNC:24965	17q21.33
EMG1	EMG1 N1-specific pseudouridine methyltransferase	HGNC:16912	12p13
ENOPH1	enolase-phosphatase 1	HGNC:24599	4q21.3
ENSA	endosulfine alpha	HGNC:3360	1q21.3
EPB41L4B	erythrocyte membrane protein band 4.1 like 4B	HGNC:19818	9q22.1-q22.3
EPG5	ectopic P-granules autophagy protein 5 homolog (C. elegans)	HGNC:29331	18q12.3
EPHB2	EPH receptor B2	HGNC:3393	1p36.1-p35
EPX	eosinophil peroxidase	HGNC:3423	17q23.1
ERAP2	endoplasmic reticulum aminopeptidase 2	HGNC:29499	5q15
ERCC2	excision repair cross-complementing rodent repair deficiency, complementation group 2	HGNC:3434	19q13.3
ERCC4	excision repair cross-complementing rodent repair deficiency, complementation group 4	HGNC:3436	16p13.3
ERI2	ERI1 exoribonuclease family member 2	HGNC:30541	16p12.3
EVC	Ellis van Creveld syndrome	HGNC:3497	4p16
EWSR1	EWS RNA-binding protein 1	HGNC:3508	22q12.2
EXD2	exonuclease 3'-5' domain containing 2	HGNC:20217	14q24.1
EXOC3	exocyst complex component 3	HGNC:30378	5p15.33
EXOC7	exocyst complex component 7	HGNC:23214	17q25.3
EXOSC3	exosome component 3	HGNC:17944	9p11
EXOSC7	exosome component 7	HGNC:28112	3p21.32
EXT2	exostosin glycosyltransferase 2	HGNC:3513	11p12-p11
EZR	ezrin	HGNC:12691	6q25.3
FAHD2A	fumarylacetoacetate hydrolase domain containing 2A	HGNC:24252	2q11.2
FAM105B	family with sequence similarity 105, member B	HGNC:25118	5p15.2
FAM120B	family with sequence similarity 120B	HGNC:21109	6q27
FAM126A	family with sequence similarity 126, member A	HGNC:24587	7p15.3
FAM129A	family with sequence similarity 129, member A	HGNC:16784	1q25
FAM161A	family with sequence similarity 161, member A	HGNC:25808	2p15
FAM214B	family with sequence similarity 214, member B	HGNC:25666	9p13.2
FAM21A	family with sequence similarity 21, member A	HGNC:23416	10q11.23
FAM32A	family with sequence similarity 32, member A	HGNC:24563	19pter-p13.3
FAM54A	mitochondrial fission regulator 2	HGNC:21115	6q23.2
FAM65A	family with sequence similarity 65, member A	HGNC:25836	16q22.1
FAM82A2	regulator of microtubule dynamics 3	HGNC:25550	15q15.1
FAM98B	family with sequence similarity 98, member B	HGNC:26773	15q14
FANCI	Fanconi anemia, complementation group I	HGNC:25568	15q26.1
FANCL	Fanconi anemia, complementation group L	HGNC:20748	2p16.1
FAR2	fatty acyl CoA reductase 2	HGNC:25531	12p11.23
FARP2	FERM, RhoGEF and pleckstrin domain protein 2	HGNC:16460	2q37.3
FBXL14	F-box and leucine-rich repeat protein 14	HGNC:28624	12p13.33
FBXL4	F-box and leucine-rich repeat protein 4	HGNC:13601	6q16.1-q16.3
FBXL5	F-box and leucine-rich repeat protein 5	HGNC:13602	4p15.33
FBXL6	F-box and leucine-rich repeat protein 6	HGNC:13603	8q24.3
FBXO10	F-box protein 10	HGNC:13589	9p13.1
FBXO21	F-box protein 21	HGNC:13592	12q24.23
FBXO31	F-box protein 31	HGNC:16510	16q24
FBXO33	F-box protein 33	HGNC:19833	14q13.3
FBXO4	F-box protein 4	HGNC:13583	5p12
FBXO42	F-box protein 42	HGNC:29249	1p36.23-p36.11
FBXO44	F-box protein 44	HGNC:24847	1p36.21
FBXO5	F-box protein 5	HGNC:13584	6q25-q26
FBXW7	F-box and WD repeat domain containing 7, E3 ubiquitin protein ligase	HGNC:16712	4q31.23
FBXW8	F-box and WD repeat domain containing 8	HGNC:13597	12q24.23
FEM1B	fem-1 homolog b (C. elegans)	HGNC:3649	15q22
FERMT2	fermitin family member 2	HGNC:15767	14q22.1
FERMT3	fermitin family member 3	HGNC:23151	11q13.1
FGA	fibrinogen alpha chain	HGNC:3661	4q28
FGFR1OP2	FGFR1 oncogene partner 2	HGNC:23098	12p12.1
FH	fumarate hydratase	HGNC:3700	1q42.1
FHAD1	forkhead-associated (FHA) phosphopeptide binding domain 1	HGNC:29408	1p36.21
FIP1L1	FIP1 like 1 (S. cerevisiae)	HGNC:19124	4q11-q12
FKBP3	FK506 binding protein 3, 25kDa	HGNC:3719	14q21.2
FLAD1	flavin adenine dinucleotide synthetase 1	HGNC:24671	1q22
FLYWCH1	FLYWCH-type zinc finger 1	HGNC:25404	16p13.3
FNDC3A	fibronectin type III domain containing 3A	HGNC:20296	13q14.12
FNIP1	folliculin interacting protein 1	HGNC:29418	5q23.3
FNIP2	folliculin interacting protein 2	HGNC:29280	4q32.1
FNTA	farnesyltransferase, CAAX box, alpha	HGNC:3782	8p11.21
FOS	FBJ murine osteosarcoma viral oncogene homolog	HGNC:3796	14q24.3
FOXK2	forkhead box K2	HGNC:6036	17q25
FOXM1	forkhead box M1	HGNC:3818	12p13
FPGS	folylpolyglutamate synthase	HGNC:3824	9cen-q34
FRG1	FSHD region gene 1	HGNC:3954	4q35
FRMD4B	FERM domain containing 4B	HGNC:24886	3p14.2
FSCN1	fascin homolog 1, actin-bundling protein (Strongylocentrotus purpuratus)	HGNC:11148	7p22
FTSJ1	FtsJ RNA methyltransferase homolog 1 (E. coli)	HGNC:13254	Xp11.23
FUBP1	far upstream element (FUSE) binding protein 1	HGNC:4004	1p31.1
GABARAPL2	GABA(A) receptor-associated protein-like 2	HGNC:13291	16q22.1
GADD45GIP1	growth arrest and DNA-damage-inducible, gamma interacting protein 1	HGNC:29996	19p13.2
GAK	cyclin G associated kinase	HGNC:4113	4p16
GALNT2	UDP-N-acetyl-alpha-D-galactosamine:polypeptide N-acetylgalactosaminyltransferase 2 (GalNAc-T2)	HGNC:4124	1q41-q42
GANAB	glucosidase, alpha; neutral AB	HGNC:4138	11q12.3
GAPVD1	GTPase activating protein and VPS9 domains 1	HGNC:23375	9q34.11
GART	phosphoribosylglycinamide formyltransferase, phosphoribosylglycinamide synthetase, phosphoribosylaminoimidazole synthetase	HGNC:4163	21q22.11
GATAD2B	GATA zinc finger domain containing 2B	HGNC:30778	1q21.3
GATC	glutamyl-tRNA(Gln) amidotransferase, subunit C	HGNC:25068	12q24.31
GBF1	golgi brefeldin A resistant guanine nucleotide exchange factor 1	HGNC:4181	10q24
GBP1	guanylate binding protein 1, interferon-inducible	HGNC:4182	1p22.2
GBP5	guanylate binding protein 5	HGNC:19895	1p22.2
GCA	grancalcin, EF-hand calcium binding protein	HGNC:15990	2q24.2
GCC1	GRIP and coiled-coil domain containing 1	HGNC:19095	7q22.3
GCC2	GRIP and coiled-coil domain containing 2	HGNC:23218	2q12.3
GCLM	glutamate-cysteine ligase, modifier subunit	HGNC:4312	1p21
GEMIN6	gem (nuclear organelle) associated protein 6	HGNC:20044	2p22.1
GFPT2	glutamine-fructose-6-phosphate transaminase 2	HGNC:4242	5q
GGA2	golgi-associated, gamma adaptin ear containing, ARF binding protein 2	HGNC:16064	16p12
GIGYF2	GRB10 interacting GYF protein 2	HGNC:11960	2q37.1
GIPC1	GIPC PDZ domain containing family, member 1	HGNC:1226	19p13.1
GLE1	GLE1 RNA export mediator homolog (yeast)	HGNC:4315	9q34.13
GLMN	glomulin, FKBP associated protein	HGNC:14373	1p22.1
GMDS	GDP-mannose 4,6-dehydratase	HGNC:4369	6p25
GNAI2	guanine nucleotide binding protein (G protein), alpha inhibiting activity polypeptide 2	HGNC:4385	3p21.31
GNAI3	guanine nucleotide binding protein (G protein), alpha inhibiting activity polypeptide 3	HGNC:4387	1p13
GNB2	guanine nucleotide binding protein (G protein), beta polypeptide 2	HGNC:4398	7q21.3-q22.1
GNPDA1	glucosamine-6-phosphate deaminase 1	HGNC:4417	5q21
GNPDA2	glucosamine-6-phosphate deaminase 2	HGNC:21526	4p13
GOLPH2	golgi membrane protein 1	HGNC:15451	9q21.33
GORAB	golgin, RAB6-interacting	HGNC:25676	1q24.2
GPATCH2L	G patch domain containing 2-like	HGNC:20210	14q24.3
GPATCH4	G patch domain containing 4	HGNC:25982	1q22
GPATCH8	G patch domain containing 8	HGNC:29066	17q21.31
GPBP1	GC-rich promoter binding protein 1	HGNC:29520	5q11.2
GPD2	glycerol-3-phosphate dehydrogenase 2 (mitochondrial)	HGNC:4456	2q24.1
GPHN	gephyrin	HGNC:15465	14q23.3
GRAMD1A	GRAM domain containing 1A	HGNC:29305	19q13.13
GRB2	growth factor receptor-bound protein 2	HGNC:4566	17q24-q25
GRM8	glutamate receptor, metabotropic 8	HGNC:4600	7q31.3-q32.1
GSK3B	glycogen synthase kinase 3 beta	HGNC:4617	3q13.3
GSTM4	glutathione S-transferase mu 4	HGNC:4636	1p13.3
GTF2B	general transcription factor IIB	HGNC:4648	1p22-p21
GTF2H2C	general transcription factor IIH, polypeptide 2C	HGNC:31394	5q13.2
GTF2H3	general transcription factor IIH, polypeptide 3, 34kDa	HGNC:4657	12q24.31
GTF2H5	general transcription factor IIH, polypeptide 5	HGNC:21157	6q25.3
GTF3C5	general transcription factor IIIC, polypeptide 5, 63kDa	HGNC:4668	9q34.13
GTPBP8	GTP-binding protein 8 (putative)	HGNC:25007	3q13.2
GUCY1A3	guanylate cyclase 1, soluble, alpha 3	HGNC:4685	4q31.3-q33
GUCY1B3	guanylate cyclase 1, soluble, beta 3	HGNC:4687	4q31.3-q33
GUCY2F	guanylate cyclase 2F, retinal	HGNC:4691	Xq22
H1F0	H1 histone family, member 0	HGNC:4714	22q13.1
H2AFX	H2A histone family, member X	HGNC:4739	11q23.3
HABP4	hyaluronan binding protein 4	HGNC:17062	9q22.3-q31
HADH2	hydroxysteroid (17-beta) dehydrogenase 10	HGNC:4800	Xp11.2
HADHB	hydroxyacyl-CoA dehydrogenase/3-ketoacyl-CoA thiolase/enoyl-CoA hydratase (trifunctional protein), beta subunit	HGNC:4803	2p23
HAGHL	hydroxyacylglutathione hydrolase-like	HGNC:14177	16p13.3
HAUS7	HAUS augmin-like complex, subunit 7	HGNC:32979	Xq28
HBP1	HMG-box transcription factor 1	HGNC:23200	7q22-q31
HCST	hematopoietic cell signal transducer	HGNC:16977	19q13.1
HDGF	hepatoma-derived growth factor	HGNC:4856	1q21-q23
HEATR5A	HEAT repeat containing 5A	HGNC:20276	14q12
HECTD4	HECT domain containing E3 ubiquitin protein ligase 4	HGNC:26611	12q24.13
HECW1	HECT, C2 and WW domain containing E3 ubiquitin protein ligase 1	HGNC:22195	7p13
HELZ2	helicase with zinc finger 2, transcriptional coactivator	HGNC:30021	20q13.33
HEMK1	HemK methyltransferase family member 1	HGNC:24923	3p21
HERC1	HECT and RLD domain containing E3 ubiquitin protein ligase family member 1	HGNC:4867	15q22
HERC2	HECT and RLD domain containing E3 ubiquitin protein ligase 2	HGNC:4868	15q13
HERC4	HECT and RLD domain containing E3 ubiquitin protein ligase 4	HGNC:24521	10
HEXA	hexosaminidase A (alpha polypeptide)	HGNC:4878	15q24.1
HGF	hepatocyte growth factor (hepapoietin A; scatter factor)	HGNC:4893	7q21.1
HHIP	hedgehog interacting protein	HGNC:14866	4q31.21-q31.3
HID1	HID1 domain containing	HGNC:15736	17q25.1
HIGD1A	HIG1 hypoxia inducible domain family, member 1A	HGNC:29527	3p22.1
HINT1	histidine triad nucleotide binding protein 1	HGNC:4912	5q31.2
HIRA	histone cell cycle regulator	HGNC:4916	22q11.2
HIST1H3A	histone cluster 1, H3a	HGNC:4766	6p22.1
HIST2H3A	histone cluster 2, H3a	HGNC:20505	1q21.2
HIVEP1	human immunodeficiency virus type I enhancer binding protein 1	HGNC:4920	6p24-p22.3
HJURP	Holliday junction recognition protein	HGNC:25444	2q37.1
HLA-DRB5	major histocompatibility complex, class II, DR beta 5	HGNC:4953	6p21.3
HLA-F	major histocompatibility complex, class I, F	HGNC:4963	6p21.3
HLA-H	major histocompatibility complex, class I, H (pseudogene)	HGNC:4965	6p21.3
HNRNPA1	heterogeneous nuclear ribonucleoprotein A1	HGNC:5031	12q13.1
HNRNPM	heterogeneous nuclear ribonucleoprotein M	HGNC:5046	19p13.3-p13.2
HNRPDL	heterogeneous nuclear ribonucleoprotein D-like	HGNC:5037	4q21.22
HPS3	Hermansky-Pudlak syndrome 3	HGNC:15597	3q24
HPS5	Hermansky-Pudlak syndrome 5	HGNC:17022	11p14
HRG	histidine-rich glycoprotein	HGNC:5181	3q27
HSD17B10	hydroxysteroid (17-beta) dehydrogenase 10	HGNC:4800	Xp11.2
HSH2D	hematopoietic SH2 domain containing	HGNC:24920	19p13.12
HSP90AA5P	heat shock protein 90kDa alpha (cytosolic), class A member 5, pseudogene	HGNC:32535	3q27.1
HSPA13	heat shock protein 70kDa family, member 13	HGNC:11375	21q11.1
HSPA14	heat shock 70kDa protein 14	HGNC:29526	10p13
HSPB1	heat shock 27kDa protein 1	HGNC:5246	7q11.23
HSPB11	heat shock protein family B (small), member 11	HGNC:25019	1p32
HSPBAP1	HSPB (heat shock 27kDa) associated protein 1	HGNC:16389	3q21.1
HSPE1	heat shock 10kDa protein 1 (chaperonin 10)	HGNC:5269	2q33.1
HTN3	histatin 3	HGNC:5284	4q13
HTT	huntingtin	HGNC:4851	4p16.3
HYLS1	hydrolethalus syndrome 1	HGNC:26558	11q24
IDI1	isopentenyl-diphosphate delta isomerase 1	HGNC:5387	10p15.3
IER2	immediate early response 2	HGNC:28871	19p13.13
IER3IP1	immediate early response 3 interacting protein 1	HGNC:18550	18q12
IFI30	interferon, gamma-inducible protein 30	HGNC:5398	19p13.1
IGF1	insulin-like growth factor 1 (somatomedin C)	HGNC:5464	12q23.2
IGF2BP3	insulin-like growth factor 2 mRNA binding protein 3	HGNC:28868	7p15.3
IGHA1	immunoglobulin heavy constant alpha 1	HGNC:5478	14q32.33
IGLC2	immunoglobulin lambda constant 2 (Kern-Oz- marker)	HGNC:5856	22q11.2
IGSF8	immunoglobulin superfamily, member 8	HGNC:17813	1q23.1
IK	IK cytokine, down-regulator of HLA II	HGNC:5958	5q31.3
IKBKG	inhibitor of kappa light polypeptide gene enhancer in B-cells, kinase gamma	HGNC:5961	Xq28
IL17RB	interleukin 17 receptor B	HGNC:18015	3p21.1
IL1R2	interleukin 1 receptor, type II	HGNC:5994	2q12
IL1RN	interleukin 1 receptor antagonist	HGNC:6000	2q14.2
IL2RB	interleukin 2 receptor, beta	HGNC:6009	22q13
ILF3	interleukin enhancer binding factor 3, 90kDa	HGNC:6038	19p13.2
ILK	integrin-linked kinase	HGNC:6040	11p15.4
ILVBL	ilvB (bacterial acetolactate synthase)-like	HGNC:6041	19p13.1
INSIG1	insulin induced gene 1	HGNC:6083	7q36
INTS4	integrator complex subunit 4	HGNC:25048	11q14.1
INTS9	integrator complex subunit 9	HGNC:25592	8p21.1
IPCEF1	interaction protein for cytohesin exchange factors 1	HGNC:21204	6q25.2
IPO11	importin 11	HGNC:20628	5q12.1
IPO7	importin 7	HGNC:9852	11p15.3
IPO8	importin 8	HGNC:9853	12p11.21
IPPK	inositol 1,3,4,5,6-pentakisphosphate 2-kinase	HGNC:14645	9q22.31
IQSEC1	IQ motif and Sec7 domain 1	HGNC:29112	3p25.2
IREB2	iron-responsive element binding protein 2	HGNC:6115	15
IRF2BP1	interferon regulatory factor 2 binding protein 1	HGNC:21728	19q13.32
IRF2BPL	interferon regulatory factor 2 binding protein-like	HGNC:14282	14q24.3
IRF7	interferon regulatory factor 7	HGNC:6122	11p15.5
IRF8	interferon regulatory factor 8	HGNC:5358	16q24.1
ISCU	iron-sulfur cluster scaffold homolog (E. coli)	HGNC:29882	12q24.1
ITCH	itchy E3 ubiquitin protein ligase	HGNC:13890	20q11.22
ITM2A	integral membrane protein 2A	HGNC:6173	Xq13.3-q21.2
ITM2C	integral membrane protein 2C	HGNC:6175	2q37
ITPA	inosine triphosphatase (nucleoside triphosphate pyrophosphatase)	HGNC:6176	20p
ITPK1	inositol-tetrakisphosphate 1-kinase	HGNC:6177	14q32.12
IVD	isovaleryl-CoA dehydrogenase	HGNC:6186	15q14-q15
IVL	involucrin	HGNC:6187	1q21
JARID1C	lysine (K)-specific demethylase 5C	HGNC:11114	Xp11.22-p11.21
KANK2	KN motif and ankyrin repeat domains 2	HGNC:29300	19p13.2
KAT2A	K(lysine) acetyltransferase 2A	HGNC:4201	17q12-q21
KAT6A	K(lysine) acetyltransferase 6A	HGNC:13013	8p11
KAT6B	K(lysine) acetyltransferase 6B	HGNC:17582	10q22.2
KBTBD4	kelch repeat and BTB (POZ) domain containing 4	HGNC:23761	11p11.2
KCNAB2	potassium voltage-gated channel, shaker-related subfamily, beta member 2	HGNC:6229	1p36.3
KCNK10	potassium channel, subfamily K, member 10	HGNC:6273	14q31
KCTD1	potassium channel tetramerisation domain containing 1	HGNC:18249	18
KCTD2	potassium channel tetramerisation domain containing 2	HGNC:21294	17q25.2
KDM2B	lysine (K)-specific demethylase 2B	HGNC:13610	12q24.31
KDM4A	lysine (K)-specific demethylase 4A	HGNC:22978	1p34.1
KDM5A	lysine (K)-specific demethylase 5A	HGNC:9886	12p13.33
KDM6B	lysine (K)-specific demethylase 6B	HGNC:29012	17p13.1
KDSR	3-ketodihydrosphingosine reductase	HGNC:4021	18q21
KHNYN	KH and NYN domain containing	HGNC:20166	14q11.2
KIAA0090	ER membrane protein complex subunit 1	HGNC:28957	1p36.13
KIAA0100	KIAA0100	HGNC:28960	17q11.2
KIAA0513	KIAA0513	HGNC:29058	16q24.1
KIAA1551	KIAA1551	HGNC:25559	12p11.21
KIAA1967	KIAA1967	HGNC:23360	8p22
KIF18A	kinesin family member 18A	HGNC:29441	11p14.1
KIF26B	kinesin family member 26B	HGNC:25484	1q44
KIFC1	kinesin family member C1	HGNC:6389	6p21.32
KL	klotho	HGNC:6344	13q12
KLF10	Kruppel-like factor 10	HGNC:11810	8q22.3
KLHL12	kelch-like family member 12	HGNC:19360	1q32.1
KLHL13	kelch-like family member 13	HGNC:22931	Xq23-q24
KLHL15	kelch-like family member 15	HGNC:29347	Xp22.1-p21
KLHL21	kelch-like family member 21	HGNC:29041	1p36
KLHL29	kelch-like family member 29	HGNC:29404	2p23.3
KPNA2	karyopherin alpha 2 (RAG cohort 1, importin alpha 1)	HGNC:6395	17q24.2
KRI1	KRI1 homolog (S. cerevisiae)	HGNC:25769	19p13.2
KRT6A	keratin 6A	HGNC:6443	12q13.13
KRT6C	keratin 6C	HGNC:20406	12q13.13
KRTDAP	keratinocyte differentiation-associated protein	HGNC:16313	19
KSR1	kinase suppressor of ras 1	HGNC:6465	17q11.2
LACRT	lacritin	HGNC:16430	12q13
LAMP1	lysosomal-associated membrane protein 1	HGNC:6499	13q34
LARGE	like-glycosyltransferase	HGNC:6511	22q12.3
LARP1B	La ribonucleoprotein domain family, member 1B	HGNC:24704	4q28.2
LARP4	La ribonucleoprotein domain family, member 4	HGNC:24320	12q13.12
LARS	leucyl-tRNA synthetase	HGNC:6512	5q32
LBR	lamin B receptor	HGNC:6518	1q42.1
LCN1	lipocalin 1	HGNC:6525	9q34
LCP2	lymphocyte cytosolic protein 2 (SH2 domain containing leukocyte protein of 76kDa)	HGNC:6529	5q35.1
LDHB	lactate dehydrogenase B	HGNC:6541	12p12.2-p12.1
LDLR	low density lipoprotein receptor	HGNC:6547	19p13.2
LEMD3	LEM domain containing 3	HGNC:28887	12q14
LEPREL1	leprecan-like 1	HGNC:19317	3q29
LGALSL	lectin, galactoside-binding-like	HGNC:25012	2p14
LIAS	lipoic acid synthetase	HGNC:16429	4p14
LIG1	ligase I, DNA, ATP-dependent	HGNC:6598	19q13.2-q13.3
LPCAT1	lysophosphatidylcholine acyltransferase 1	HGNC:25718	5p15.33
LPCAT4	lysophosphatidylcholine acyltransferase 4	HGNC:30059	15q14
LPIN2	lipin 2	HGNC:14450	18p
LRIG3	leucine-rich repeats and immunoglobulin-like domains 3	HGNC:30991	12q13.2
LRPAP1	low density lipoprotein receptor-related protein associated protein 1	HGNC:6701	4p16.3
LRRC20	leucine rich repeat containing 20	HGNC:23421	10q22.2
LRRCC1	leucine rich repeat and coiled-coil centrosomal protein 1	HGNC:29373	8q21.2
LRRK2	leucine-rich repeat kinase 2	HGNC:18618	12q12
LRSAM1	leucine rich repeat and sterile alpha motif containing 1	HGNC:25135	9q34.13
LSM14B	LSM14B, SCD6 homolog B (S. cerevisiae)	HGNC:15887	20q13.33
LSM2	LSM2 homolog, U6 small nuclear RNA associated (S. cerevisiae)	HGNC:13940	6p21.3
LSM8	N(alpha)-acetyltransferase 38, NatC auxiliary subunit	HGNC:20471	7q31.1-q31.3
LTA4H	leukotriene A4 hydrolase	HGNC:6710	12q22
LTB	lymphotoxin beta (TNF superfamily, member 3)	HGNC:6711	6p21.3
LTN1	listerin E3 ubiquitin protein ligase 1	HGNC:13082	21q21.3
LYPLA2	lysophospholipase II	HGNC:6738	1p36.11
LYPLAL1	lysophospholipase-like 1	HGNC:20440	1q41
LYRM1	LYR motif containing 1	HGNC:25074	16p12.2
LYZ	lysozyme	HGNC:6740	12q15
MACC1	metastasis associated in colon cancer 1	HGNC:30215	7p15.3
MAD1L1	MAD1 mitotic arrest deficient-like 1 (yeast)	HGNC:6762	7p22
MAF1	MAF1 homolog (S. cerevisiae)	HGNC:24966	8q24.3
MAGED2	melanoma antigen family D, 2	HGNC:16353	Xp11.2
MALT1	mucosa associated lymphoid tissue lymphoma translocation gene 1	HGNC:6819	18q21
MAN2C1	mannosidase, alpha, class 2C, member 1	HGNC:6827	15q11-qter
MAP1B	microtubule-associated protein 1B	HGNC:6836	5q13
MAP3K3	mitogen-activated protein kinase kinase kinase 3	HGNC:6855	17q
MAP3K7	mitogen-activated protein kinase kinase kinase 7	HGNC:6859	6q15
MAP3K7IP1	TGF-beta activated kinase 1/MAP3K7 binding protein 1	HGNC:18157	22q13.1
MAP3K8	mitogen-activated protein kinase kinase kinase 8	HGNC:6860	10p11.2
MAP4K1	mitogen-activated protein kinase kinase kinase kinase 1	HGNC:6863	19q13.1-q13.4
MAPK11	mitogen-activated protein kinase 11	HGNC:6873	22q13.33
MAPK14	mitogen-activated protein kinase 14	HGNC:6876	6p21.3-p21.2
MAPK6	mitogen-activated protein kinase 6	HGNC:6879	15q21
MAPK8IP2	mitogen-activated protein kinase 8 interacting protein 2	HGNC:6883	22q13.33
MAPK9	mitogen-activated protein kinase 9	HGNC:6886	5q35
MAPKAP1	mitogen-activated protein kinase associated protein 1	HGNC:18752	9q34.11
MARK2	MAP/microtubule affinity-regulating kinase 2	HGNC:3332	11q13.1
MCCC1	methylcrotonoyl-CoA carboxylase 1 (alpha)	HGNC:6936	3q27.1
MCM2	minichromosome maintenance complex component 2	HGNC:6944	3q21
MCRS1	microspherule protein 1	HGNC:6960	12q13.12
MED14	mediator complex subunit 14	HGNC:2370	Xp11.4
MED17	mediator complex subunit 17	HGNC:2375	11q21
MED25	mediator complex subunit 25	HGNC:28845	19q13.3
MED6	mediator complex subunit 6	HGNC:19970	14q24.1
METTL1	methyltransferase like 1	HGNC:7030	12q13
METTL10	methyltransferase like 10	HGNC:33787	10q26.13
METTL13	methyltransferase like 13	HGNC:24248	1q24-q25.3
METTL15	methyltransferase like 15	HGNC:26606	11p14.1
METTL16	methyltransferase like 16	HGNC:28484	17p13.3
METTL5	methyltransferase like 5	HGNC:25006	2q31.1
MFAP1	microfibrillar-associated protein 1	HGNC:7032	15q15-q21
MGC4618	transmembrane protein 175	HGNC:28709	4p16.3
MGLL	monoglyceride lipase	HGNC:17038	3p13-q13.33
MGST3	microsomal glutathione S-transferase 3	HGNC:7064	1q23
MICU1	mitochondrial calcium uptake 1	HGNC:1530	10q22.1
MIOS	missing oocyte, meiosis regulator, homolog (Drosophila)	HGNC:21905	7p21.3
MITD1	MIT, microtubule interacting and transport, domain containing 1	HGNC:25207	2q11.2
MKL1	megakaryoblastic leukemia (translocation) 1	HGNC:14334	22q13
MLL	lysine (K)-specific methyltransferase 2A	HGNC:7132	11q23
MLL2	lysine (K)-specific methyltransferase 2D	HGNC:7133	12q13.12
MLL3	lysine (K)-specific methyltransferase 2C	HGNC:13726	7q36
MLYCD	malonyl-CoA decarboxylase	HGNC:7150	16q24
MMP17	matrix metallopeptidase 17 (membrane-inserted)	HGNC:7163	12q24.3
MMS19	MMS19 nucleotide excision repair homolog (S. cerevisiae)	HGNC:13824	10q24-q25
MOAP1	modulator of apoptosis 1	HGNC:16658	14q32.12
MOB3A	MOB kinase activator 3A	HGNC:29802	19p13.3
MOCS2	molybdenum cofactor synthesis 2	HGNC:7193	5q11
MON1B	MON1 homolog B (yeast)	HGNC:25020	16q23.1
MON2	MON2 homolog (S. cerevisiae)	HGNC:29177	12q14.1
MORC4	MORC family CW-type zinc finger 4	HGNC:23485	Xq22.3
MOXD1	monooxygenase, DBH-like 1	HGNC:21063	6q23.2
MPHOSPH9	M-phase phosphoprotein 9	HGNC:7215	12q24
MPI	mannose phosphate isomerase	HGNC:7216	15q22-qter
MPP6	membrane protein, palmitoylated 6 (MAGUK p55 subfamily member 6)	HGNC:18167	7p15
MRPL11	mitochondrial ribosomal protein L11	HGNC:14042	11q13.2
MRPL41	mitochondrial ribosomal protein L41	HGNC:14492	9q34.3
MRPL43	mitochondrial ribosomal protein L43	HGNC:14517	10q24.31
MRPS22	mitochondrial ribosomal protein S22	HGNC:14508	3q23
MRPS7	mitochondrial ribosomal protein S7	HGNC:14499	17q25.1
MS4A1	membrane-spanning 4-domains, subfamily A, member 1	HGNC:7315	11q12-q13.1
MSH5	mutS homolog 5 (E. coli)	HGNC:7328	6p21.3
MSL3	male-specific lethal 3 homolog (Drosophila)	HGNC:7370	Xp22.3
MST4	-	-	-
MTA3	metastasis associated 1 family, member 3	HGNC:23784	2p22.1
MTMR3	myotubularin related protein 3	HGNC:7451	22q12.2
MTMR6	myotubularin related protein 6	HGNC:7453	13q12
MTOR	mechanistic target of rapamycin (serine/threonine kinase)	HGNC:3942	1p36
MUL1	mitochondrial E3 ubiquitin protein ligase 1	HGNC:25762	1p36.12
MVD	mevalonate (diphospho) decarboxylase	HGNC:7529	16q24.3
MXD4	MAX dimerization protein 4	HGNC:13906	4p16.3
MYL10	myosin, light chain 10, regulatory	HGNC:29825	7q22.1
MYL12B	myosin, light chain 12B, regulatory	HGNC:29827	18p11.31
MYLIP	myosin regulatory light chain interacting protein	HGNC:21155	6p23-p22.3
MYNN	myoneurin	HGNC:14955	3q26.31
MYO5A	myosin VA (heavy chain 12, myoxin)	HGNC:7602	15q21
N-TAF1	-	-	-
N4BP1	NEDD4 binding protein 1	HGNC:29850	16q12.1
NBEAL2	neurobeachin-like 2	HGNC:31928	3p21.31
NBN	nibrin	HGNC:7652	8q21-q24
NCAPG	non-SMC condensin I complex, subunit G	HGNC:24304	4p15.32
NCF1B	neutrophil cytosolic factor 1B pseudogene	HGNC:32522	7q11.23
NCK2	NCK adaptor protein 2	HGNC:7665	2q12
NCOR1	nuclear receptor corepressor 1	HGNC:7672	17p11.2
NDE1	nudE nuclear distribution E homolog 1 (A. nidulans)	HGNC:17619	16p13.11
NDEL1	nudE nuclear distribution E homolog (A. nidulans)-like 1	HGNC:17620	17p13.1
NDUFA12	NADH dehydrogenase (ubiquinone) 1 alpha subcomplex, 12	HGNC:23987	12q22
NDUFAB1	NADH dehydrogenase (ubiquinone) 1, alpha/beta subcomplex, 1, 8kDa	HGNC:7694	16p12.3
NDUFAF4	NADH dehydrogenase (ubiquinone) complex I, assembly factor 4	HGNC:21034	6q16.3
NDUFB1	NADH dehydrogenase (ubiquinone) 1 beta subcomplex, 1, 7kDa	HGNC:7695	14q31.3
NDUFB10	NADH dehydrogenase (ubiquinone) 1 beta subcomplex, 10, 22kDa	HGNC:7696	16p13.3
NDUFB3	NADH dehydrogenase (ubiquinone) 1 beta subcomplex, 3, 12kDa	HGNC:7698	2q33.1
NDUFS3	NADH dehydrogenase (ubiquinone) Fe-S protein 3, 30kDa (NADH-coenzyme Q reductase)	HGNC:7710	11p11.11
NEDD9	neural precursor cell expressed, developmentally down-regulated 9	HGNC:7733	6p25-p24
NEMF	nuclear export mediator factor	HGNC:10663	14q21.3
NET1	neuroepithelial cell transforming 1	HGNC:14592	10p15
NFKB1	nuclear factor of kappa light polypeptide gene enhancer in B-cells 1	HGNC:7794	4q24
NFKBIE	nuclear factor of kappa light polypeptide gene enhancer in B-cells inhibitor, epsilon	HGNC:7799	6p21.1
NFYC	nuclear transcription factor Y, gamma	HGNC:7806	1p32
NGDN	neuroguidin, EIF4E binding protein	HGNC:20271	14q11.2
NGLY1	N-glycanase 1	HGNC:17646	3p23
NIN	ninein (GSK3B interacting protein)	HGNC:14906	14q21-q22
NINJ2	ninjurin 2	HGNC:7825	12p13
NISCH	nischarin	HGNC:18006	3p21.1
NKIRAS1	NFKB inhibitor interacting Ras-like 1	HGNC:17899	3p24.1
NME7	NME/NM23 family member 7	HGNC:20461	1q24.2
NNT	nicotinamide nucleotide transhydrogenase	HGNC:7863	5p12
NOC4L	nucleolar complex associated 4 homolog (S. cerevisiae)	HGNC:28461	12q24.33
NOL10	nucleolar protein 10	HGNC:25862	2p25.1
NOL8	nucleolar protein 8	HGNC:23387	9q22.32
NOMO3	NODAL modulator 3	HGNC:25242	16p13
NOP14	NOP14 nucleolar protein	HGNC:16821	4p16.3
NOP16	NOP16 nucleolar protein	HGNC:26934	5q35.2
NOTCH1	notch 1	HGNC:7881	9q34.3
NPL	N-acetylneuraminate pyruvate lyase (dihydrodipicolinate synthase)	HGNC:16781	1q25
NR2F2	nuclear receptor subfamily 2, group F, member 2	HGNC:7976	15q26
NSMCE1	non-SMC element 1 homolog (S. cerevisiae)	HGNC:29897	16p12.1
NSMCE2	non-SMC element 2, MMS21 homolog (S. cerevisiae)	HGNC:26513	8q24.13
NSMCE4A	non-SMC element 4 homolog A (S. cerevisiae)	HGNC:25935	10q26.13
NSUN4	NOP2/Sun domain family, member 4	HGNC:31802	1p34
NSUN6	NOP2/Sun domain family, member 6	HGNC:23529	10p13
NTHL1	nth endonuclease III-like 1 (E. coli)	HGNC:8028	16p13.3
NUDCD1	NudC domain containing 1	HGNC:24306	8q23
NUDT12	nudix (nucleoside diphosphate linked moiety X)-type motif 12	HGNC:18826	5q15
NUFIP2	nuclear fragile X mental retardation protein interacting protein 2	HGNC:17634	17q11.1
NUMA1	nuclear mitotic apparatus protein 1	HGNC:8059	11q13
NUMB	numb homolog (Drosophila)	HGNC:8060	14q24.3
NUP133	nucleoporin 133kDa	HGNC:18016	1q42.13
NUP88	nucleoporin 88kDa	HGNC:8067	17p13
OARD1	O-acyl-ADP-ribose deacylase 1	HGNC:21257	6p21.1
OBFC1	oligonucleotide/oligosaccharide-binding fold containing 1	HGNC:26200	10q25.1
OBSCN	obscurin, cytoskeletal calmodulin and titin-interacting RhoGEF	HGNC:15719	1q42
OCA2	oculocutaneous albinism II	HGNC:8101	15q12
OCIAD1	OCIA domain containing 1	HGNC:16074	4p11
OCIAD2	OCIA domain containing 2	HGNC:28685	4p12
OGFOD1	2-oxoglutarate and iron-dependent oxygenase domain containing 1	HGNC:25585	16q12.2
OPA3	optic atrophy 3 (autosomal recessive, with chorea and spastic paraplegia)	HGNC:8142	19q13.2-q13.3
ORC1	origin recognition complex, subunit 1	HGNC:8487	1p32
ORC2	origin recognition complex, subunit 2	HGNC:8488	2q33
ORM1	orosomucoid 1	HGNC:8498	9q31-qter
ORMDL2	ORM1-like 2 (S. cerevisiae)	HGNC:16037	12q13.2
OSBPL11	oxysterol binding protein-like 11	HGNC:16397	3q21
OSBPL5	oxysterol binding protein-like 5	HGNC:16392	11p15.4
OSBPL8	oxysterol binding protein-like 8	HGNC:16396	12q14
OSBPL9	oxysterol binding protein-like 9	HGNC:16386	1p32.3
OSGIN2	oxidative stress induced growth inhibitor family member 2	HGNC:1355	8q21
OXCT1	3-oxoacid CoA transferase 1	HGNC:8527	5p13
OXTR	oxytocin receptor	HGNC:8529	3p25
PA2G4	proliferation-associated 2G4, 38kDa	HGNC:8550	12q13.2
PAF1	Paf1, RNA polymerase II associated factor, homolog (S. cerevisiae)	HGNC:25459	19q13.1
PAN2	PAN2 poly(A) specific ribonuclease subunit homolog (S. cerevisiae)	HGNC:20074	12q13.2
PANK3	pantothenate kinase 3	HGNC:19365	5q35.1
PAPD4	PAP associated domain containing 4	HGNC:26776	5q14.1
PAQR4	progestin and adipoQ receptor family member IV	HGNC:26386	16p13
PARD3	par-3 partitioning defective 3 homolog (C. elegans)	HGNC:16051	10p11.22
PARP10	poly (ADP-ribose) polymerase family, member 10	HGNC:25895	8q24
PARP15	poly (ADP-ribose) polymerase family, member 15	HGNC:26876	3q21
PARP3	poly (ADP-ribose) polymerase family, member 3	HGNC:273	3p22.2-p21.1
PARPBP	PARP1 binding protein	HGNC:26074	12q23.2
PARVG	parvin, gamma	HGNC:14654	22q13.31
PATL1	protein associated with topoisomerase II homolog 1 (yeast)	HGNC:26721	11q12.1
PATZ1	POZ (BTB) and AT hook containing zinc finger 1	HGNC:13071	22q12.2
PAXIP1	PAX interacting (with transcription-activation domain) protein 1	HGNC:8624	7q36
PCCB	propionyl CoA carboxylase, beta polypeptide	HGNC:8654	3q21-q22
PCDHB14	protocadherin beta 14	HGNC:8685	5q31
PCGF1	polycomb group ring finger 1	HGNC:17615	2p13.1
PCID2	PCI domain containing 2	HGNC:25653	13q34
PCM1	pericentriolar material 1	HGNC:8727	8p22-p21.3
PCMTD2	protein-L-isoaspartate (D-aspartate) O-methyltransferase domain containing 2	HGNC:15882	20q13.33
PCNT	pericentrin	HGNC:16068	21q22.3
PCYT1A	phosphate cytidylyltransferase 1, choline, alpha	HGNC:8754	3q29
PDCD6IP	programmed cell death 6 interacting protein	HGNC:8766	3p22.3
PDCD7	programmed cell death 7	HGNC:8767	15q22.2
PDE4B5	-	-	-
PDF	peptide deformylase (mitochondrial)	HGNC:30012	16q22.1
PDIA6	protein disulfide isomerase family A, member 6	HGNC:30168	2p25.1
PDLIM1	PDZ and LIM domain 1	HGNC:2067	10q23.1
PDLIM2	PDZ and LIM domain 2 (mystique)	HGNC:13992	8p21.3
PDPK1	3-phosphoinositide dependent protein kinase-1	HGNC:8816	16p13.3
PELP1	proline, glutamate and leucine rich protein 1	HGNC:30134	17p13.2
PEPD	peptidase D	HGNC:8840	19q13.11
PER1	period circadian clock 1	HGNC:8845	17p13.1
PES1	pescadillo ribosomal biogenesis factor 1	HGNC:8848	22q12.1
PEX12	peroxisomal biogenesis factor 12	HGNC:8854	17q21.1
PEX14	peroxisomal biogenesis factor 14	HGNC:8856	1p36.22
PEX16	peroxisomal biogenesis factor 16	HGNC:8857	11p
PEX5	peroxisomal biogenesis factor 5	HGNC:9719	12p
PEX6	peroxisomal biogenesis factor 6	HGNC:8859	6p22-p11
PFDN4	prefoldin subunit 4	HGNC:8868	20q13.2
PFDN5	prefoldin subunit 5	HGNC:8869	12q13.13
PFKM	phosphofructokinase, muscle	HGNC:8877	12q13.11
PGAM1	phosphoglycerate mutase 1 (brain)	HGNC:8888	10q25.3
PGAM5	phosphoglycerate mutase family member 5	HGNC:28763	12q24.33
PGP	phosphoglycolate phosphatase	HGNC:8909	16p13.3
PHACTR1	phosphatase and actin regulator 1	HGNC:20990	6p23
PHF11	PHD finger protein 11	HGNC:17024	13q14.11
PHF21A	PHD finger protein 21A	HGNC:24156	11p11.2
PHF23	PHD finger protein 23	HGNC:28428	17p13.1
PHF3	PHD finger protein 3	HGNC:8921	6
PHF8	PHD finger protein 8	HGNC:20672	Xp11.22
PI4KA	phosphatidylinositol 4-kinase, catalytic, alpha	HGNC:8983	22q11.21
PIGB	phosphatidylinositol glycan anchor biosynthesis, class B	HGNC:8959	15q21.3
PIGR	polymeric immunoglobulin receptor	HGNC:8968	1q31-q41
PIK3CD	phosphatidylinositol-4,5-bisphosphate 3-kinase, catalytic subunit delta	HGNC:8977	1p36.2
PIK3R1	phosphoinositide-3-kinase, regulatory subunit 1 (alpha)	HGNC:8979	5q13.1
PIK3R3	phosphoinositide-3-kinase, regulatory subunit 3 (gamma)	HGNC:8981	1p34.1
PIK3R6	phosphoinositide-3-kinase, regulatory subunit 6	HGNC:27101	17p13.1
PIN1	peptidylprolyl cis/trans isomerase, NIMA-interacting 1	HGNC:8988	19p13
PITHD1	PITH (C-terminal proteasome-interacting domain of thioredoxin-like) domain containing 1	HGNC:25022	1p36.11
PITPNM1	phosphatidylinositol transfer protein, membrane-associated 1	HGNC:9003	11q13
PKHD1L1	polycystic kidney and hepatic disease 1 (autosomal recessive)-like 1	HGNC:20313	8q23
PKLR	pyruvate kinase, liver and RBC	HGNC:9020	1q22
PKMYT1	protein kinase, membrane associated tyrosine/threonine 1	HGNC:29650	16p13.3
PKNOX1	PBX/knotted 1 homeobox 1	HGNC:9022	21q22.3
PLD1	phospholipase D1, phosphatidylcholine-specific	HGNC:9067	3q26
PLEKHB1	pleckstrin homology domain containing, family B (evectins) member 1	HGNC:19079	11q13.5-q14.1
PML	promyelocytic leukemia	HGNC:9113	15q24.1
PMM1	phosphomannomutase 1	HGNC:9114	22q13
PMM2	phosphomannomutase 2	HGNC:9115	16p13
PMPCA	peptidase (mitochondrial processing) alpha	HGNC:18667	9q34.3
PNPO	pyridoxamine 5'-phosphate oxidase	HGNC:30260	17q21.32
POGLUT1	protein O-glucosyltransferase 1	HGNC:22954	3q13.33
POLA2	polymerase (DNA directed), alpha 2, accessory subunit	HGNC:30073	11q13
POLD2	polymerase (DNA directed), delta 2, accessory subunit	HGNC:9176	7p13
POLDIP2	polymerase (DNA-directed), delta interacting protein 2	HGNC:23781	17q11.2
POLG	polymerase (DNA directed), gamma	HGNC:9179	15q24
POLK	polymerase (DNA directed) kappa	HGNC:9183	5q13
POLR1B	polymerase (RNA) I polypeptide B, 128kDa	HGNC:20454	2q13
POLR1C	polymerase (RNA) I polypeptide C, 30kDa	HGNC:20194	6p21.1
POLR3B	polymerase (RNA) III (DNA directed) polypeptide B	HGNC:30348	12q24
POLR3D	polymerase (RNA) III (DNA directed) polypeptide D, 44kDa	HGNC:1080	8q21
POLR3E	polymerase (RNA) III (DNA directed) polypeptide E (80kD)	HGNC:30347	16p12
POLR3G	polymerase (RNA) III (DNA directed) polypeptide G (32kD)	HGNC:30075	5q14
POM121	POM121 transmembrane nucleoporin	HGNC:19702	7q11.23
POM121B	POM121 transmembrane nucleoporin B (pseudogene)	HGNC:34004	7q11.23
POM121C	POM121 transmembrane nucleoporin C	HGNC:34005	7q11.23
POP1	processing of precursor 1, ribonuclease P/MRP subunit (S. cerevisiae)	HGNC:30129	8q22.2
PPA2	pyrophosphatase (inorganic) 2	HGNC:28883	4q25
PPCDC	phosphopantothenoylcysteine decarboxylase	HGNC:28107	15q24.2
PPCS	phosphopantothenoylcysteine synthetase	HGNC:25686	1p34.2
PPIB	peptidylprolyl isomerase B (cyclophilin B)	HGNC:9255	15q21-q22
PPIG	peptidylprolyl isomerase G (cyclophilin G)	HGNC:14650	2q31.1
PPIP5K1	diphosphoinositol pentakisphosphate kinase 1	HGNC:29023	15q15.3
PPL	periplakin	HGNC:9273	16p13.3
PPM1G	protein phosphatase, Mg2+/Mn2+ dependent, 1G	HGNC:9278	2p23.3
PPP1CB	protein phosphatase 1, catalytic subunit, beta isozyme	HGNC:9282	2p23
PPP1R15B	protein phosphatase 1, regulatory subunit 15B	HGNC:14951	1q32.1
PPP1R21	protein phosphatase 1, regulatory subunit 21	HGNC:30595	2p16.3
PPP1R8	protein phosphatase 1, regulatory subunit 8	HGNC:9296	1p35.3
PPP1R9B	protein phosphatase 1, regulatory subunit 9B	HGNC:9298	17q21.33
PPP2R5C	protein phosphatase 2, regulatory subunit B', gamma	HGNC:9311	14q32.31
PPP2R5D	protein phosphatase 2, regulatory subunit B', delta	HGNC:9312	6p21.1
PPP2R5E	protein phosphatase 2, regulatory subunit B', epsilon isoform	HGNC:9313	14q23.2
PPP4R2	protein phosphatase 4, regulatory subunit 2	HGNC:18296	3q29
PPP6R3	protein phosphatase 6, regulatory subunit 3	HGNC:1173	11q13
PREPL	prolyl endopeptidase-like	HGNC:30228	2p22.1
PRKAR2A	protein kinase, cAMP-dependent, regulatory, type II, alpha	HGNC:9391	3p21.3-p21.2
PRKRA	protein kinase, interferon-inducible double stranded RNA dependent activator	HGNC:9438	2q31.2
PRMT3	protein arginine methyltransferase 3	HGNC:30163	11p15.1
PRMT5	protein arginine methyltransferase 5	HGNC:10894	14q11.2
PRNPIP	ERI1 exoribonuclease family member 3	HGNC:17276	1p34.1
PRPF6	PRP6 pre-mRNA processing factor 6 homolog (S. cerevisiae)	HGNC:15860	20q13.33
PRPS2	phosphoribosyl pyrophosphate synthetase 2	HGNC:9465	Xp22.2
PRR12	proline rich 12	HGNC:29217	19q13.33
PRR14	proline rich 14	HGNC:28458	16p11.2
PRRC2B	proline-rich coiled-coil 2B	HGNC:28121	9q34.13
PRTN3	proteinase 3	HGNC:9495	19p13.3
PSIP1	PC4 and SFRS1 interacting protein 1	HGNC:9527	9p22.2
PSMA7	proteasome (prosome, macropain) subunit, alpha type, 7	HGNC:9536	20q13.33
PSMB10	proteasome (prosome, macropain) subunit, beta type, 10	HGNC:9538	16q22.1
PSMB6	proteasome (prosome, macropain) subunit, beta type, 6	HGNC:9543	17p13
PSMD6	proteasome (prosome, macropain) 26S subunit, non-ATPase, 6	HGNC:9564	3p14.1
PSME3	proteasome (prosome, macropain) activator subunit 3 (PA28 gamma; Ki)	HGNC:9570	17q12-q21
PSME4	proteasome (prosome, macropain) activator subunit 4	HGNC:20635	2p16.1
PSMG4	proteasome (prosome, macropain) assembly chaperone 4	HGNC:21108	6p25.2
PTDSS1	phosphatidylserine synthase 1	HGNC:9587	8q22
PTEN	phosphatase and tensin homolog	HGNC:9588	10q23
PTGS1	prostaglandin-endoperoxide synthase 1 (prostaglandin G/H synthase and cyclooxygenase)	HGNC:9604	9q32-q33.3
PTH1R	parathyroid hormone 1 receptor	HGNC:9608	3p22-p21.1
PTK7	protein tyrosine kinase 7	HGNC:9618	6p21.1-p12.2
PTOV1	prostate tumor overexpressed 1	HGNC:9632	19q13.33
PTP4A3	protein tyrosine phosphatase type IVA, member 3	HGNC:9636	8q24.3
PTPN1	protein tyrosine phosphatase, non-receptor type 1	HGNC:9642	20q13.1-q13.2
PTPN14	protein tyrosine phosphatase, non-receptor type 14	HGNC:9647	1q32.2
PTPN22	protein tyrosine phosphatase, non-receptor type 22 (lymphoid)	HGNC:9652	1p13.2
PTPN23	protein tyrosine phosphatase, non-receptor type 23	HGNC:14406	3p21.3
PTPN6	protein tyrosine phosphatase, non-receptor type 6	HGNC:9658	12p13.31
PTPN9	protein tyrosine phosphatase, non-receptor type 9	HGNC:9661	15q23
PTRHD1	peptidyl-tRNA hydrolase domain containing 1	HGNC:33782	2p23.3
PUM1	pumilio homolog 1 (Drosophila)	HGNC:14957	1p35.2
PUM2	pumilio homolog 2 (Drosophila)	HGNC:14958	2p22-p21
QARS	glutaminyl-tRNA synthetase	HGNC:9751	3p21.31
R3HDM1	R3H domain containing 1	HGNC:9757	2q21.3
RAB10	RAB10, member RAS oncogene family	HGNC:9759	2p23.3
RAB11A	RAB11A, member RAS oncogene family	HGNC:9760	15q22.31
RAB21	RAB21, member RAS oncogene family	HGNC:18263	12q15
RAB7A	RAB7A, member RAS oncogene family	HGNC:9788	3q21
RABGGTA	Rab geranylgeranyltransferase, alpha subunit	HGNC:9795	14q11.2
RABL3	RAB, member of RAS oncogene family-like 3	HGNC:18072	3q13.33
RAD18	RAD18 homolog (S. cerevisiae)	HGNC:18278	3p25-p24
RAD50	RAD50 homolog (S. cerevisiae)	HGNC:9816	5q23-q31
RAF1	v-raf-1 murine leukemia viral oncogene homolog 1	HGNC:9829	3p25
RAP2C	RAP2C, member of RAS oncogene family	HGNC:21165	Xq25
RARS	arginyl-tRNA synthetase	HGNC:9870	5q35.1
RASA3	RAS p21 protein activator 3	HGNC:20331	13q34
RBBP4	retinoblastoma binding protein 4	HGNC:9887	1p35.1
RBBP6	retinoblastoma binding protein 6	HGNC:9889	16p12.2
RBCK1	RanBP-type and C3HC4-type zinc finger containing 1	HGNC:15864	20p13
RBM26	RNA binding motif protein 26	HGNC:20327	13q31.1
RBM27	RNA binding motif protein 27	HGNC:29243	5q32
RBM43	RNA binding motif protein 43	HGNC:24790	2q23.3
RBMXL1	RNA binding motif protein, X-linked-like 1	HGNC:25073	1p22.2
RCC1	regulator of chromosome condensation 1	HGNC:1913	1p35.3
RCL	2'-deoxynucleoside 5'-phosphate N-hydrolase 1	HGNC:21218	6p21.1
RCOR3	REST corepressor 3	HGNC:25594	1q32.3
RDX	radixin	HGNC:9944	11q23
REST	RE1-silencing transcription factor	HGNC:9966	4q12
REV3L	REV3-like, polymerase (DNA directed), zeta, catalytic subunit	HGNC:9968	6q22
REXO1	REX1, RNA exonuclease 1 homolog (S. cerevisiae)	HGNC:24616	19p13.3
RFC4	replication factor C (activator 1) 4, 37kDa	HGNC:9972	3q27
RFC5	replication factor C (activator 1) 5, 36.5kDa	HGNC:9973	12q24.3
RFX3	regulatory factor X, 3 (influences HLA class II expression)	HGNC:9984	9p24.2
RFXANK	regulatory factor X-associated ankyrin-containing protein	HGNC:9987	19p12
RHOF	ras homolog family member F (in filopodia)	HGNC:15703	12
RHOH	ras homolog family member H	HGNC:686	4p13
RIN3	Ras and Rab interactor 3	HGNC:18751	14q32.13
RING1	ring finger protein 1	HGNC:10018	6p21.3
RMND5B	required for meiotic nuclear division 5 homolog B (S. cerevisiae)	HGNC:26181	5q35.3
RND3	Rho family GTPase 3	HGNC:671	2q23.3
RNF121	ring finger protein 121	HGNC:21070	11q13.3
RNF133	ring finger protein 133	HGNC:21154	7q31.33
RNF20	ring finger protein 20, E3 ubiquitin protein ligase	HGNC:10062	9q22
RNF25	ring finger protein 25	HGNC:14662	2q35
RNFT1	ring finger protein, transmembrane 1	HGNC:30206	17q23.2
RNH1	ribonuclease/angiogenin inhibitor 1	HGNC:10074	11p15.5
ROCK1	Rho-associated, coiled-coil containing protein kinase 1	HGNC:10251	18q11.2
ROCK2	Rho-associated, coiled-coil containing protein kinase 2	HGNC:10252	2p24
RORA	RAR-related orphan receptor A	HGNC:10258	15q21-q22
RP11-397C18.4	-	-	-
RPAP2	RNA polymerase II associated protein 2	HGNC:25791	1p22.1
RPL10	ribosomal protein L10	HGNC:10298	Xq28
RPL11	ribosomal protein L11	HGNC:10301	1p36.1-p35
RPL12	ribosomal protein L12	HGNC:10302	9q34
RPL13A	ribosomal protein L13a	HGNC:10304	19q13.3
RPL18	ribosomal protein L18	HGNC:10310	19q13
RPL24	ribosomal protein L24	HGNC:10325	3q12
RPL27	ribosomal protein L27	HGNC:10328	17q21
RPL32	ribosomal protein L32	HGNC:10336	3q13.3-q21
RPL37A	ribosomal protein L37a	HGNC:10348	2q35
RPL6	ribosomal protein L6	HGNC:10362	12q24.13
RPP14	ribonuclease P/MRP 14kDa subunit	HGNC:30327	3p21.2
RPRD2	regulation of nuclear pre-mRNA domain containing 2	HGNC:29039	1q21.2
RPS10	ribosomal protein S10	HGNC:10383	6p21.31
RPS13	ribosomal protein S13	HGNC:10386	11p
RPS14	ribosomal protein S14	HGNC:10387	5q31-q33
RPS26	ribosomal protein S26	HGNC:10414	12q13
RPS28	ribosomal protein S28	HGNC:10418	19p13.2
RPS3A	ribosomal protein S3A	HGNC:10421	4q31.2-q31.3
RPS4X	ribosomal protein S4, X-linked	HGNC:10424	Xq13.1
RPS6KA4	ribosomal protein S6 kinase, 90kDa, polypeptide 4	HGNC:10433	11q11-q13
RPS6KB1	ribosomal protein S6 kinase, 70kDa, polypeptide 1	HGNC:10436	17q23.1
RPS9	ribosomal protein S9	HGNC:10442	19q13.4
RPUSD1	RNA pseudouridylate synthase domain containing 1	HGNC:14173	16p13.3
RPUSD2	RNA pseudouridylate synthase domain containing 2	HGNC:24180	15q13.3
RRAGB	Ras-related GTP binding B	HGNC:19901	Xp11.21
RRBP1	ribosome binding protein 1	HGNC:10448	20p12
RRP12	ribosomal RNA processing 12 homolog (S. cerevisiae)	HGNC:29100	10q24.2
RSL1D1	ribosomal L1 domain containing 1	HGNC:24534	16p13.13
RSRC1	arginine/serine-rich coiled-coil 1	HGNC:24152	3q25.32
RTCA	RNA 3'-terminal phosphate cyclase	HGNC:17981	1p13.3
RUNX3	runt-related transcription factor 3	HGNC:10473	1p36
S100A10	S100 calcium binding protein A10	HGNC:10487	1q21
S100A14	S100 calcium binding protein A14	HGNC:18901	1q21.1
S100A4	S100 calcium binding protein A4	HGNC:10494	1q12-q22
S100A7A	S100 calcium binding protein A7A	HGNC:21657	1q22
SAE1	SUMO1 activating enzyme subunit 1	HGNC:30660	19q13.32
SAMD9	sterile alpha motif domain containing 9	HGNC:1348	7q21.2
SAMHD1	SAM domain and HD domain 1	HGNC:15925	20pter-q12
SARS	seryl-tRNA synthetase	HGNC:10537	1p13.3
SBDS	Shwachman-Bodian-Diamond syndrome	HGNC:19440	7q11.22
SBF1	SET binding factor 1	HGNC:10542	22q13.33
SCGB1D1	secretoglobin, family 1D, member 1	HGNC:18395	11q13
SCGB1D2	secretoglobin, family 1D, member 2	HGNC:18396	11q13
SCGB2A2	secretoglobin, family 2A, member 2	HGNC:7050	11q13
SCIMP	SLP adaptor and CSK interacting membrane protein	HGNC:33504	17p13.2
SCLT1	sodium channel and clathrin linker 1	HGNC:26406	4q28.2
SCOC	short coiled-coil protein	HGNC:20335	4q28.3
SCPEP1	serine carboxypeptidase 1	HGNC:29507	17q22
SDCBP	syndecan binding protein (syntenin)	HGNC:10662	8q12.1
SDF4	stromal cell derived factor 4	HGNC:24188	1p36.33
SDHAF1	succinate dehydrogenase complex assembly factor 1	HGNC:33867	19q13.12
SDHB	succinate dehydrogenase complex, subunit B, iron sulfur (Ip)	HGNC:10681	1p36.1-p35
SEC11L1	SEC11 homolog A (S. cerevisiae)	HGNC:17718	15q25.2
SEC61B	Sec61 beta subunit	HGNC:16993	9q22.32-q31.3
SENP7	SUMO1/sentrin specific peptidase 7	HGNC:30402	3q12
37135	septin 1	HGNC:2879	16p11.2
40787	septin 11	HGNC:25589	4q21.1
SERF1A	small EDRK-rich factor 1A (telomeric)	HGNC:10755	5q13
SERINC2	serine incorporator 2	HGNC:23231	1p35.1
SERPINB5	serpin peptidase inhibitor, clade B (ovalbumin), member 5	HGNC:8949	18q21.33
SETD3	SET domain containing 3	HGNC:20493	14q32.2
SETD8	SET domain containing (lysine methyltransferase) 8	HGNC:29489	12q24.31
SETDB1	SET domain, bifurcated 1	HGNC:10761	1q21
SETX	senataxin	HGNC:445	9q34
SFN	stratifin	HGNC:10773	1p36.11
SGK223	-	-	-
SGSH	N-sulfoglucosamine sulfohydrolase	HGNC:10818	17q25.3
SHMT2	serine hydroxymethyltransferase 2 (mitochondrial)	HGNC:10852	12q12-q14
SIDT1	SID1 transmembrane family, member 1	HGNC:25967	3q13.31
SIRT6	sirtuin 6	HGNC:14934	19p13.3
SKAP2	src kinase associated phosphoprotein 2	HGNC:15687	7p15.2
SKIV2L2	superkiller viralicidic activity 2-like 2 (S. cerevisiae)	HGNC:18734	5q11.2
SLAIN1	SLAIN motif family, member 1	HGNC:26387	13q22.3
SLC12A2	solute carrier family 12 (sodium/potassium/chloride transporters), member 2	HGNC:10911	5q23.3
SLC16A13	solute carrier family 16, member 13 (monocarboxylic acid transporter 13)	HGNC:31037	17p13.1
SLC1A5	solute carrier family 1 (neutral amino acid transporter), member 5	HGNC:10943	19q13.3
SLC22A2	solute carrier family 22 (organic cation transporter), member 2	HGNC:10966	6q25.3
SLC25A1	solute carrier family 25 (mitochondrial carrier; citrate transporter), member 1	HGNC:10979	22q11
SLC25A38	solute carrier family 25, member 38	HGNC:26054	3p22.1
SLC25A40	solute carrier family 25, member 40	HGNC:29680	7q21.12
SLC25A43	solute carrier family 25, member 43	HGNC:30557	Xq24
SLC2A1	solute carrier family 2 (facilitated glucose transporter), member 1	HGNC:11005	1p34.2
SLC2A3	solute carrier family 2 (facilitated glucose transporter), member 3	HGNC:11007	12p13.3
SLC30A7	solute carrier family 30 (zinc transporter), member 7	HGNC:19306	1p21.1
SLC35A3	solute carrier family 35 (UDP-N-acetylglucosamine (UDP-GlcNAc) transporter), member A3	HGNC:11023	1p21
SLC38A7	solute carrier family 38, member 7	HGNC:25582	16q21
SLC38A9	solute carrier family 38, member 9	HGNC:26907	5q11.2
SLC5A6	solute carrier family 5 (sodium-dependent vitamin transporter), member 6	HGNC:11041	2p23
SMAD1	SMAD family member 1	HGNC:6767	4q31.21
SMAD3	SMAD family member 3	HGNC:6769	15q21-q22
SMARCC1	SWI/SNF related, matrix associated, actin dependent regulator of chromatin, subfamily c, member 1	HGNC:11104	3p21.31
SMARCC2	SWI/SNF related, matrix associated, actin dependent regulator of chromatin, subfamily c, member 2	HGNC:11105	12q13.2
SMC5	structural maintenance of chromosomes 5	HGNC:20465	9q21.11
SMCR7L	Smith-Magenis syndrome chromosome region, candidate 7-like	HGNC:25979	22q13.1
SMG9	smg-9 homolog, nonsense mediated mRNA decay factor (C. elegans)	HGNC:25763	19q13.31
SNAPC4	small nuclear RNA activating complex, polypeptide 4, 190kDa	HGNC:11137	9q34.3
SNRNP70	small nuclear ribonucleoprotein 70kDa (U1)	HGNC:11150	19q13.3
SNRPB2	small nuclear ribonucleoprotein polypeptide B	HGNC:11155	20p12.1
SNW1	SNW domain containing 1	HGNC:16696	14q22.1-q22.3
SNX7	sorting nexin 7	HGNC:14971	1p21
SOGA1	suppressor of glucose, autophagy associated 1	HGNC:16111	20q11.23
SON	SON DNA binding protein	HGNC:11183	21q22.1-q22.2
SOS2	son of sevenless homolog 2 (Drosophila)	HGNC:11188	14q21
SOWAHD	sosondowah ankyrin repeat domain family member D	HGNC:32960	Xq24
SPAG1	sperm associated antigen 1	HGNC:11212	8q22
SPATA13	spermatogenesis associated 13	HGNC:23222	13q12.13
SPCS1	signal peptidase complex subunit 1 homolog (S. cerevisiae)	HGNC:23401	3p21.31
SPECC1	sperm antigen with calponin homology and coiled-coil domains 1	HGNC:30615	17p11.2
SPG20	spastic paraplegia 20 (Troyer syndrome)	HGNC:18514	13q13.1
SPIN4	spindlin family, member 4	HGNC:27040	Xq11.1
SPOPL	speckle-type POZ protein-like	HGNC:27934	2q22.1
SPRYD3	SPRY domain containing 3	HGNC:25920	12q13.13
SPSB3	splA/ryanodine receptor domain and SOCS box containing 3	HGNC:30629	16p13.3
SPTBN2	spectrin, beta, non-erythrocytic 2	HGNC:11276	11q13.2
SQLE	squalene epoxidase	HGNC:11279	8q24.1
SRC	v-src sarcoma (Schmidt-Ruppin A-2) viral oncogene homolog (avian)	HGNC:11283	20q12-q13
SRCAP	Snf2-related CREBBP activator protein	HGNC:16974	16p11.2
SRF	serum response factor (c-fos serum response element-binding transcription factor)	HGNC:11291	6p
SRGN	serglycin	HGNC:9361	10q22.1
SRP9	signal recognition particle 9kDa	HGNC:11304	1q42.12
SRPK1	SRSF protein kinase 1	HGNC:11305	6p21.31
SSBP1	single-stranded DNA binding protein 1, mitochondrial	HGNC:11317	7q34
ST13	suppression of tumorigenicity 13 (colon carcinoma) (Hsp70 interacting protein)	HGNC:11343	22q13.2
ST3GAL2	ST3 beta-galactoside alpha-2,3-sialyltransferase 2	HGNC:10863	16q22.3
ST6GAL1	ST6 beta-galactosamide alpha-2,6-sialyltranferase 1	HGNC:10860	3q27-q28
STAB2	stabilin 2	HGNC:18629	12q23.3
STAMBP	STAM binding protein	HGNC:16950	2p24.3-p24.1
STARD5	StAR-related lipid transfer (START) domain containing 5	HGNC:18065	15q26
STAT5A	signal transducer and activator of transcription 5A	HGNC:11366	17q11.2
STAT5B	signal transducer and activator of transcription 5B	HGNC:11367	17q11.2
STIM1	stromal interaction molecule 1	HGNC:11386	11p15.5
STK10	serine/threonine kinase 10	HGNC:11388	5q35.1
STK11IP	serine/threonine kinase 11 interacting protein	HGNC:19184	2q35
STK17B	serine/threonine kinase 17b	HGNC:11396	2q33.1
STK36	serine/threonine kinase 36	HGNC:17209	2q35
STOML2	stomatin (EPB72)-like 2	HGNC:14559	9p13.1
STRN4	striatin, calmodulin binding protein 4	HGNC:15721	19q13.32
STT3A	STT3A, subunit of the oligosaccharyltransferase complex (catalytic)	HGNC:6172	11q23.3
STXBP5	syntaxin binding protein 5 (tomosyn)	HGNC:19665	6q24.3
STYXL1	serine/threonine/tyrosine interacting-like 1	HGNC:18165	7q11.23
SUCLG1	succinate-CoA ligase, alpha subunit	HGNC:11449	2p11.3
SUDS3	suppressor of defective silencing 3 homolog (S. cerevisiae)	HGNC:29545	12q24.23
SUMO1	small ubiquitin-like modifier 1	HGNC:12502	2q33
SWAP70	SWAP switching B-cell complex 70kDa subunit	HGNC:17070	11p15
SYK	spleen tyrosine kinase	HGNC:11491	9q22
SYMPK	symplekin	HGNC:22935	19q13.3
SYNJ2	synaptojanin 2	HGNC:11504	6q25.3
SYNRG	synergin, gamma	HGNC:557	17
TACC1	transforming, acidic coiled-coil containing protein 1	HGNC:11522	8p11
TADA1	transcriptional adaptor 1	HGNC:30631	1q24.1
TAF11	TAF11 RNA polymerase II, TATA box binding protein (TBP)-associated factor, 28kDa	HGNC:11544	6p21
TAF2	TAF2 RNA polymerase II, TATA box binding protein (TBP)-associated factor, 150kDa	HGNC:11536	8q24
TAF8	TAF8 RNA polymerase II, TATA box binding protein (TBP)-associated factor, 43kDa	HGNC:17300	6p21.1
TANC1	tetratricopeptide repeat, ankyrin repeat and coiled-coil containing 1	HGNC:29364	2q24.2
TAOK3	TAO kinase 3	HGNC:18133	12q
TARDBP	TAR DNA binding protein	HGNC:11571	1p36.22
TARS	threonyl-tRNA synthetase	HGNC:11572	5p13.2
TARSL2	threonyl-tRNA synthetase-like 2	HGNC:24728	15q26.3
TATDN2	TatD DNase domain containing 2	HGNC:28988	3p25.3
TBC1D18	RAB GTPase activating protein 1-like	HGNC:24663	1q24
TBC1D8B	TBC1 domain family, member 8B (with GRAM domain)	HGNC:24715	Xq22.3
TBC1D9B	TBC1 domain family, member 9B (with GRAM domain)	HGNC:29097	5q35.3
TBCA	tubulin folding cofactor A	HGNC:11579	5q14.1
TCEB2	transcription elongation factor B (SIII), polypeptide 2 (18kDa, elongin B)	HGNC:11619	16p12.3
TCERG1	transcription elongation regulator 1	HGNC:15630	5q31
TCHP	trichoplein, keratin filament binding	HGNC:28135	12q24.11
TCL1A	T-cell leukemia/lymphoma 1A	HGNC:11648	14q32.1
TCOF1	Treacher Collins-Franceschetti syndrome 1	HGNC:11654	5q32
TCP1	t-complex 1	HGNC:11655	6q25-q27
TDG	thymine-DNA glycosylase	HGNC:11700	12q24.1
TDP1	tyrosyl-DNA phosphodiesterase 1	HGNC:18884	14q32.11
TDRD1	tudor domain containing 1	HGNC:11712	10q26.11
TDRD7	tudor domain containing 7	HGNC:30831	9q22.33
TEC	tec protein tyrosine kinase	HGNC:11719	4p12
TECPR2	tectonin beta-propeller repeat containing 2	HGNC:19957	14q32.33
TEF	thyrotrophic embryonic factor	HGNC:11722	22q13.2
TEP1	telomerase-associated protein 1	HGNC:11726	14q11.2
TERF2IP	telomeric repeat binding factor 2, interacting protein	HGNC:19246	16q23.1
TESC	tescalcin	HGNC:26065	12q24.22
TESPA1	thymocyte expressed, positive selection associated 1	HGNC:29109	12q13.2
TFAP2B	transcription factor AP-2 beta (activating enhancer binding protein 2 beta)	HGNC:11743	6p12
TFEB	transcription factor EB	HGNC:11753	6p21
TGIF2	TGFB-induced factor homeobox 2	HGNC:15764	20q11.23
THOC5	THO complex 5	HGNC:19074	22q12
THOC7	THO complex 7 homolog (Drosophila)	HGNC:29874	3p14.1
TIMM8B	translocase of inner mitochondrial membrane 8 homolog B (yeast)	HGNC:11818	11q23.1-q23.2
TIMP1	TIMP metallopeptidase inhibitor 1	HGNC:11820	Xp11.3-p11.23
TLR10	toll-like receptor 10	HGNC:15634	4p14
TLR7	toll-like receptor 7	HGNC:15631	Xp22.3
TM7SF3	transmembrane 7 superfamily member 3	HGNC:23049	12q11-q12
TMEM128	transmembrane protein 128	HGNC:28201	4p16.3
TMEM143	transmembrane protein 143	HGNC:25603	19q13.32
TMEM161B	transmembrane protein 161B	HGNC:28483	5q14.3
TMEM164	transmembrane protein 164	HGNC:26217	Xq22.3
TMEM173	transmembrane protein 173	HGNC:27962	5q31.2
TMEM19	transmembrane protein 19	HGNC:25605	12q15
TMEM209	transmembrane protein 209	HGNC:21898	7q32.2
TMEM41B	transmembrane protein 41B	HGNC:28948	11p15.3
TMEM43	transmembrane protein 43	HGNC:28472	3p25.1
TMEM55A	transmembrane protein 55A	HGNC:25452	8q21.3
TMEM70	transmembrane protein 70	HGNC:26050	8q21.11
TNFAIP8L1	tumor necrosis factor, alpha-induced protein 8-like 1	HGNC:28279	19p13.3
TNFRSF13C	tumor necrosis factor receptor superfamily, member 13C	HGNC:17755	22q13.1-q13.3
TNFRSF19	tumor necrosis factor receptor superfamily, member 19	HGNC:11915	13q12.11-q12.3
TNKS1BP1	tankyrase 1 binding protein 1, 182kDa	HGNC:19081	11q12.2
TNKS2	tankyrase, TRF1-interacting ankyrin-related ADP-ribose polymerase 2	HGNC:15677	10q23.3
TNPO2	transportin 2	HGNC:19998	19p13.13
TNRC6A	trinucleotide repeat containing 6A	HGNC:11969	16p11.2
TNS3	tensin 3	HGNC:21616	7p12.3
TOB2	transducer of ERBB2, 2	HGNC:11980	22q13.2
TOMM5	translocase of outer mitochondrial membrane 5 homolog (yeast)	HGNC:31369	9p13.2
TONSL	tonsoku-like, DNA repair protein	HGNC:7801	8q24.3
TOPORS	topoisomerase I binding, arginine/serine-rich, E3 ubiquitin protein ligase	HGNC:21653	9p21
TOX4	TOX high mobility group box family member 4	HGNC:20161	14q11.2
TPD52	tumor protein D52	HGNC:12005	8q21
TPM4	tropomyosin 4	HGNC:12013	19p13.1
TPMT	thiopurine S-methyltransferase	HGNC:12014	6p22.3
TPRKB	TP53RK binding protein	HGNC:24259	2p24.3-p24.1
TRAF3	TNF receptor-associated factor 3	HGNC:12033	14q32.32
TRANK1	tetratricopeptide repeat and ankyrin repeat containing 1	HGNC:29011	3p22.2
TRAP1	TNF receptor-associated protein 1	HGNC:16264	16p13.3
TRAPPC1	trafficking protein particle complex 1	HGNC:19894	17p13.1
TRAPPC3	trafficking protein particle complex 3	HGNC:19942	1p34.2
TRAPPC6A	trafficking protein particle complex 6A	HGNC:23069	19q13.32
TRAPPC9	trafficking protein particle complex 9	HGNC:30832	8q24.3
TRIM27	tripartite motif containing 27	HGNC:9975	6p22
TRIM28	tripartite motif containing 28	HGNC:16384	19q13.4
TRIM37	tripartite motif containing 37	HGNC:7523	17q
TRIM44	tripartite motif containing 44	HGNC:19016	11p13
TRIM5	tripartite motif containing 5	HGNC:16276	11p15
TRIM51	tripartite motif-containing 51	HGNC:19023	11p11
TRIM56	tripartite motif containing 56	HGNC:19028	7q11.2
TRIM6	tripartite motif containing 6	HGNC:16277	11p15
TRIM6-TRIM34	TRIM6-TRIM34 readthrough	HGNC:33440	11p15.4
TRIM68	tripartite motif containing 68	HGNC:21161	11p15.4
TRIM8	tripartite motif containing 8	HGNC:15579	10q24.3
TRIP13	thyroid hormone receptor interactor 13	HGNC:12307	5p15
TRIP4	thyroid hormone receptor interactor 4	HGNC:12310	15q22.1
TRMT6	tRNA methyltransferase 6 homolog (S. cerevisiae)	HGNC:20900	20p12.3
TRPC4AP	transient receptor potential cation channel, subfamily C, member 4 associated protein	HGNC:16181	20q11.23
TSEN2	tRNA splicing endonuclease 2 homolog (S. cerevisiae)	HGNC:28422	3p25.2
TSPO	translocator protein (18kDa)	HGNC:1158	22q13.3
TSSC1	tumor suppressing subtransferable candidate 1	HGNC:12383	2p25.3
TTC14	tetratricopeptide repeat domain 14	HGNC:24697	3q27.2
TTC21B	tetratricopeptide repeat domain 21B	HGNC:25660	2q24.3
TTC27	tetratricopeptide repeat domain 27	HGNC:25986	2p22.3
TTC3	tetratricopeptide repeat domain 3	HGNC:12393	21q22.2
TTC33	tetratricopeptide repeat domain 33	HGNC:29959	5p13.1
TTL	tubulin tyrosine ligase	HGNC:21586	2q13
TTN	titin	HGNC:12403	2q31
TTR	transthyretin	HGNC:12405	18q12.1
TUBB4B	tubulin, beta 4B class IVb	HGNC:20771	9q34.3
TUBGCP4	tubulin, gamma complex associated protein 4	HGNC:16691	15q15
TUT1	terminal uridylyl transferase 1, U6 snRNA-specific	HGNC:26184	11q12.2
Tti1	TELO2 interacting protein 1	HGNC:29029	20q11.23
U2AF1	U2 small nuclear RNA auxiliary factor 1	HGNC:12453	21q22.3
U2AF2	U2 small nuclear RNA auxiliary factor 2	HGNC:23156	19q13.43
UBA6	ubiquitin-like modifier activating enzyme 6	HGNC:25581	4q13.2
UBE2E1	ubiquitin-conjugating enzyme E2E 1	HGNC:12477	3p24.2
UBE2NL	ubiquitin-conjugating enzyme E2N-like	HGNC:31710	Xq27.3
UBFD1	ubiquitin family domain containing 1	HGNC:30565	16p12.1
UBQLN1	ubiquilin 1	HGNC:12508	9q22
UBR3	ubiquitin protein ligase E3 component n-recognin 3 (putative)	HGNC:30467	2q31.1
UBTD2	ubiquitin domain containing 2	HGNC:24463	5q35.1
UBXN7	UBX domain protein 7	HGNC:29119	3q29
UCKL1	uridine-cytidine kinase 1-like 1	HGNC:15938	20q13.33
UNG	uracil-DNA glycosylase	HGNC:12572	12q23-q24.1
UQCRH	ubiquinol-cytochrome c reductase hinge protein	HGNC:12590	1p34.1
URB1	URB1 ribosome biogenesis 1 homolog (S. cerevisiae)	HGNC:17344	21q22.11
URGCP	upregulator of cell proliferation	HGNC:30890	7p13
UROD	uroporphyrinogen decarboxylase	HGNC:12591	1p34
USP13	ubiquitin specific peptidase 13 (isopeptidase T-3)	HGNC:12611	3q26.2-q26.3
USP15	ubiquitin specific peptidase 15	HGNC:12613	12q14
USP18	ubiquitin specific peptidase 18	HGNC:12616	22q11.2
USP19	ubiquitin specific peptidase 19	HGNC:12617	3p21.31
USP20	ubiquitin specific peptidase 20	HGNC:12619	9q34.2
USP24	ubiquitin specific peptidase 24	HGNC:12623	1p32.3
USP27X	ubiquitin specific peptidase 27, X-linked	HGNC:13486	Xp11.23
USP28	ubiquitin specific peptidase 28	HGNC:12625	11q23
USP49	ubiquitin specific peptidase 49	HGNC:20078	6p12.1
USP5	ubiquitin specific peptidase 5 (isopeptidase T)	HGNC:12628	12p13
USP53	ubiquitin specific peptidase 53	HGNC:29255	4q26
USP9X	ubiquitin specific peptidase 9, X-linked	HGNC:12632	Xp11.4
UTP11L	UTP11-like, U3 small nucleolar ribonucleoprotein, (yeast)	HGNC:24329	1p34.3
UTP15	UTP15, U3 small nucleolar ribonucleoprotein, homolog (S. cerevisiae)	HGNC:25758	5q13.2
UTP3	UTP3, small subunit (SSU) processome component, homolog (S. cerevisiae)	HGNC:24477	4q13.3
UTP6	UTP6, small subunit (SSU) processome component, homolog (yeast)	HGNC:18279	17q11.2
VARS	valyl-tRNA synthetase	HGNC:12651	6p21.3
VAV2	vav 2 guanine nucleotide exchange factor	HGNC:12658	9q34.1
VCAN	versican	HGNC:2464	5q14.2-q14.3
VEZT	vezatin, adherens junctions transmembrane protein	HGNC:18258	12q22
VKORC1	vitamin K epoxide reductase complex, subunit 1	HGNC:23663	16p11.2
VPS13B	vacuolar protein sorting 13 homolog B (yeast)	HGNC:2183	8q22-q23
VPS13D	vacuolar protein sorting 13 homolog D (S. cerevisiae)	HGNC:23595	1p36.21
VPS26A	vacuolar protein sorting 26 homolog A (S. pombe)	HGNC:12711	10q21.1
VTA1	Vps20-associated 1 homolog (S. cerevisiae)	HGNC:20954	6q24.1
VWA8	von Willebrand factor A domain containing 8	HGNC:29071	13q14.11
VWA9	von Willebrand factor A domain containing 9	HGNC:25372	15q22.31
WAPAL	wings apart-like homolog (Drosophila)	HGNC:23293	10q23.31
WARS	tryptophanyl-tRNA synthetase	HGNC:12729	14q32.2
WDR21A	DDB1 and CUL4 associated factor 4	HGNC:20229	14q24.3
WDR35	WD repeat domain 35	HGNC:29250	2p24.3
WDR4	WD repeat domain 4	HGNC:12756	21q22.3
WDR45L	WD repeat domain 45B	HGNC:25072	17q25.3
WDR60	WD repeat domain 60	HGNC:21862	7q36.3
WDR62	WD repeat domain 62	HGNC:24502	19q13.12
WDR67	WD repeat domain 67	HGNC:30888	8q24.13
WDR70	WD repeat domain 70	HGNC:25495	5p13.2
WDR76	WD repeat domain 76	HGNC:25773	15q15.3
WDR82	WD repeat domain 82	HGNC:28826	3p21.2
WDR91	WD repeat domain 91	HGNC:24997	7q33
WIPF2	WAS/WASL interacting protein family, member 2	HGNC:30923	17q21.2
WTAP	Wilms tumor 1 associated protein	HGNC:16846	6q25-q27
XAB2	XPA binding protein 2	HGNC:14089	19p13.3
YIPF2	Yip1 domain family, member 2	HGNC:28476	19p13.2
YJEFN3	YjeF N-terminal domain containing 3	HGNC:24785	19p13.11
YTHDC2	YTH domain containing 2	HGNC:24721	5q22.3
YWHAB	tyrosine 3-monooxygenase/tryptophan 5-monooxygenase activation protein, beta polypeptide	HGNC:12849	20q13.1
ZADH2	zinc binding alcohol dehydrogenase domain containing 2	HGNC:28697	18q22.3
ZBTB11	zinc finger and BTB domain containing 11	HGNC:16740	3q12.3
ZBTB32	zinc finger and BTB domain containing 32	HGNC:16763	19q13.1
ZBTB40	zinc finger and BTB domain containing 40	HGNC:29045	1p36
ZBTB43	zinc finger and BTB domain containing 43	HGNC:17908	9q33.3
ZBTB48	zinc finger and BTB domain containing 48	HGNC:4930	1p36.3
ZBTB5	zinc finger and BTB domain containing 5	HGNC:23836	9p13.1
ZBTB6	zinc finger and BTB domain containing 6	HGNC:16764	9q33.1-q33.3
ZBTB8OS	zinc finger and BTB domain containing 8 opposite strand	HGNC:24094	1p35.1
ZC3H3	zinc finger CCCH-type containing 3	HGNC:28972	8q24.3
ZC3HAV1	zinc finger CCCH-type, antiviral 1	HGNC:23721	7q34
ZCCHC11	zinc finger, CCHC domain containing 11	HGNC:28981	1p32.3
ZFAND5	zinc finger, AN1-type domain 5	HGNC:13008	9q13-q21
ZFP82	ZFP82 zinc finger protein	HGNC:28682	19q13.13
ZFP91	ZFP91 zinc finger protein	HGNC:14983	11q12
ZFYVE20	zinc finger, FYVE domain containing 20	HGNC:20759	3p25.1
ZG16B	zymogen granule protein 16B	HGNC:30456	16p13.3
ZMPSTE24	zinc metallopeptidase STE24	HGNC:12877	1p34
ZMYM2	zinc finger, MYM-type 2	HGNC:12989	13q11-q12
ZMYND11	zinc finger, MYND-type containing 11	HGNC:16966	10p14
ZMYND8	zinc finger, MYND-type containing 8	HGNC:9397	20q13.12
ZNF175	zinc finger protein 175	HGNC:12964	19q13.4
ZNF207	zinc finger protein 207	HGNC:12998	17q11.2
ZNF224	zinc finger protein 224	HGNC:13017	19q13.2
ZNF259	zinc finger protein 259	HGNC:13051	11q23.3
ZNF26	zinc finger protein 26	HGNC:13053	12q24.33
ZNF280D	zinc finger protein 280D	HGNC:25953	15q21.2
ZNF318	zinc finger protein 318	HGNC:13578	6pter-p12.1
ZNF343	zinc finger protein 343	HGNC:16017	20p13
ZNF407	zinc finger protein 407	HGNC:19904	18q23
ZNF419	zinc finger protein 419	HGNC:20648	19q13.43
ZNF451	zinc finger protein 451	HGNC:21091	6p12.1
ZNF462	zinc finger protein 462	HGNC:21684	9q31.3
ZNF484	zinc finger protein 484	HGNC:23385	9q22.32
ZNF548	zinc finger protein 548	HGNC:26561	19q13.43
ZNF567	zinc finger protein 567	HGNC:28696	19
ZNF583	zinc finger protein 583	HGNC:26427	19
ZNF619	zinc finger protein 619	HGNC:26910	3p21.33
ZNF638	zinc finger protein 638	HGNC:17894	2p13.1
ZNF644	zinc finger protein 644	HGNC:29222	1p22.2
ZNF682	zinc finger protein 682	HGNC:28857	19p12
ZNF700	zinc finger protein 700	HGNC:25292	19p13.2
ZNF720	zinc finger protein 720	HGNC:26987	16p11.2
ZNF750	zinc finger protein 750	HGNC:25843	17q25.3
ZNF777	zinc finger protein 777	HGNC:22213	7q36.1
ZNF805	zinc finger protein 805	HGNC:23272	19q13.43
ZNF92	zinc finger protein 92	HGNC:13168	7q11.21
ZNFX1	zinc finger, NFX1-type containing 1	HGNC:29271	20q13.13
ZRANB3	zinc finger, RAN-binding domain containing 3	HGNC:25249	2q21.3
ZSCAN16	zinc finger and SCAN domain containing 16	HGNC:20813	6p21.33
ZSCAN29	zinc finger and SCAN domain containing 29	HGNC:26673	15q15.3
ZSWIM3	zinc finger, SWIM-type containing 3	HGNC:16157	20
ZSWIM6	zinc finger, SWIM-type containing 6	HGNC:29316	5q12.1
ZYG11A	zyg-11 family member A, cell cycle regulator	HGNC:32058	1p32.3
ZYX	zyxin	HGNC:13200	7q32
ZZEF1	zinc finger, ZZ-type with EF-hand domain 1	HGNC:29027	17p13.3
hCG_1988162	-	-	-
hCG_2043275	-	-	-
